# Supplementary material
Source: PubMed Central journal article supplement (PMC6754626)
Supplement: NIHMS1538685-supplement-Supplemental_Publication_Material.pdf [file NIHMS1538685-supplement-Supplemental_Publication_Material.pdf]

## SUPPLEMENTAL MATERIAL

### Association of *APOL1* Risk Alleles with Cardiovascular Disease in African Americans in the Million Veteran Program

Alexander G Bick, MD, PhD<sup>1,2\*</sup>, Elvis Akwo, MD, PhD<sup>3,4\*</sup>, Cassianne Robinson-Cohen, PhD<sup>3,4\*</sup>, Kyung Lee, MS<sup>5\*</sup>, Julie Lynch, PhD, RN<sup>5,6,7</sup>, Themistocles L Assimes, MD, PhD<sup>8,9</sup>, Scott DuVall, PhD<sup>7</sup>, Todd Edwards, PhD<sup>3,4</sup>, Huaying Fang, PhD<sup>8,9</sup>, S. Matthew Freiberg MD<sup>3,4</sup>, Ayush Giri, PhD<sup>3,4</sup>, Jennifer E Huffman, PhD<sup>1</sup>, Jie Huang, PhD<sup>1</sup>, Leland Hull, MD<sup>1,5</sup>; Rachel Kember, PhD<sup>10,11</sup>; Derek Klarin, MD<sup>1,2</sup>, Jennifer S Lee, MD<sup>8,9</sup>, Michael Levin, MD<sup>10,11</sup>, Donald R Miller, PhD<sup>5,12</sup>, Pradeep Natarajan, MD<sup>2</sup>, Danish Saleheen MBBS<sup>10,11</sup>, Qing Shao, PhD<sup>5</sup>, Yan V Sun, PhD<sup>13,14</sup>, Hua Tang, PhD<sup>8,9</sup>, Otis Wilson, BS<sup>3</sup>, Kyong-Mi Chang, MD<sup>10,11</sup>, Kelly Cho, PhD<sup>1</sup>, John Concato, MD<sup>15</sup>, J. Michael Gaziano, MD, MPH<sup>1,16</sup>, Sekar Kathiresan, MD<sup>2,16</sup>, Christopher J O'Donnell, MD<sup>1,16</sup>, Daniel J Rader, MD, PhD<sup>10</sup>, Philip S Tsao, PhD<sup>8,9</sup>, Peter W Wilson, MD<sup>13,14</sup>, Adriana M Hung, MD, MPH<sup>3,4\*</sup>, Scott M Damrauer, MD<sup>9,10\*</sup> on behalf of the VA Million Veteran Program

\*Denotes equal contribution

Affiliations: (1) Boston VA Healthcare System, Boston, MA; (2) Massachusetts General Hosp, Boston, MA and Broad Institute of MIT and Harvard, Cambridge, MA; (3) Nashville VA Medical Center, Nashville, TN; (4) Vanderbilt Univ Medical Center, Nashville, TN; (5) Edith Norse Rogers Memorial VA Medical Center, Bedford, MA; (6) University of Massachusetts College of Nursing & Health Sciences, Boston, MA (7) VA Informatics and Computing Infrastructure, Salt Lake City, UT; (8) Palo Alto VA Health Care, Palo Alto, CA; (9) Stanford Univ Sch of Med, Stanford, CA; (10) Corporal Michael Crescenz VA Med Cntr, Philadelphia, PA; (11) Perelman School of Medicine, University of Pennsylvania, Philadelphia, PA; (12) Boston Univ, Boston, MA Nashville VA Medical Center, Nashville TN; (13) Atlanta VA Medical Ctr, Atlanta, GA; (14) Emory Univ, Atlanta, GA; (15) VA Connecticut HealthCare System, New Haven, CA; (16) Harvard Medical School, Boston, MA

Correspondence to:

Dr. Scott M. Damrauer, Corporal Michael Crescenz VA Medical Center, 3900 Woodland Ave, Philadelphia, PA 19104 (Office: 215-523-5880, Email: [Scott.Damrauer@va.gov](mailto:Scott.Damrauer@va.gov))

Dr. Adriana M. Huang, Tennessee Valley Healthcare System, 1310 24<sup>th</sup> Ave S, Nashville, TN 37212 (Office: 615-327-4751, Email: [Adriana.Huang@va.gov](mailto:Adriana.Huang@va.gov))

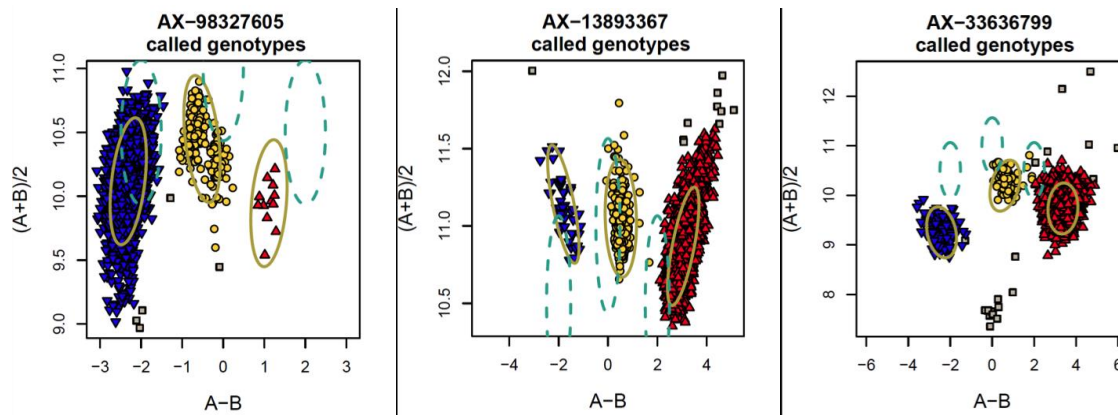

**Supplemental Figure 1. Genotype intensity clustering plots of the APOL1 risk alleles on the MVP Axiom Biobank Genotyping Array from a representative genotyping batch. The AX-13893367 probe represents G1a (rs73885319, APOL1 p.S342G). The AX-33636799 probe represents G1b (rs60910145, APOL1 p.I384M). The AX-98327605 probe represents G2 (rs71785313, APOL1 del388-389).**

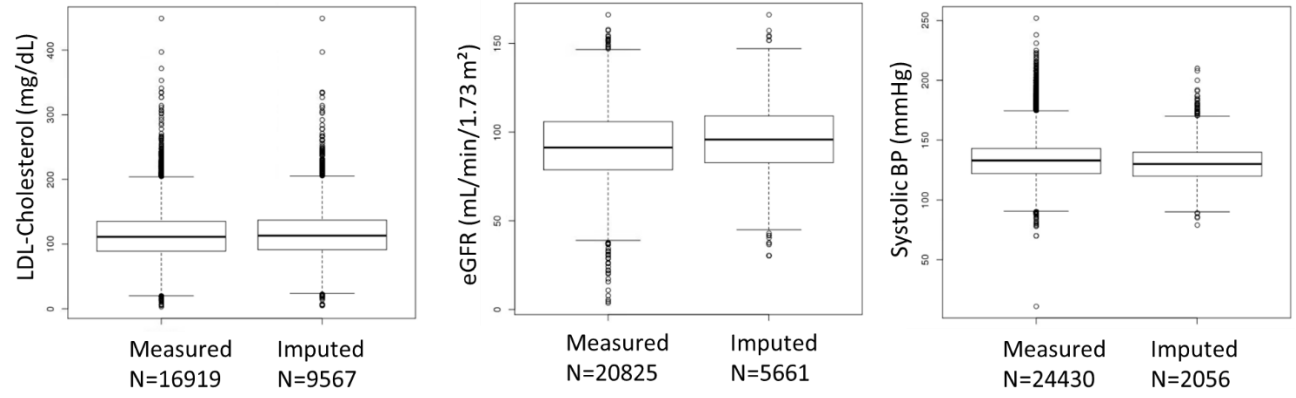

**Supplemental Figure 2. Comparison of measured and imputed data distributions for LDL-cholesterol, eGFR and systolic blood pressure.**

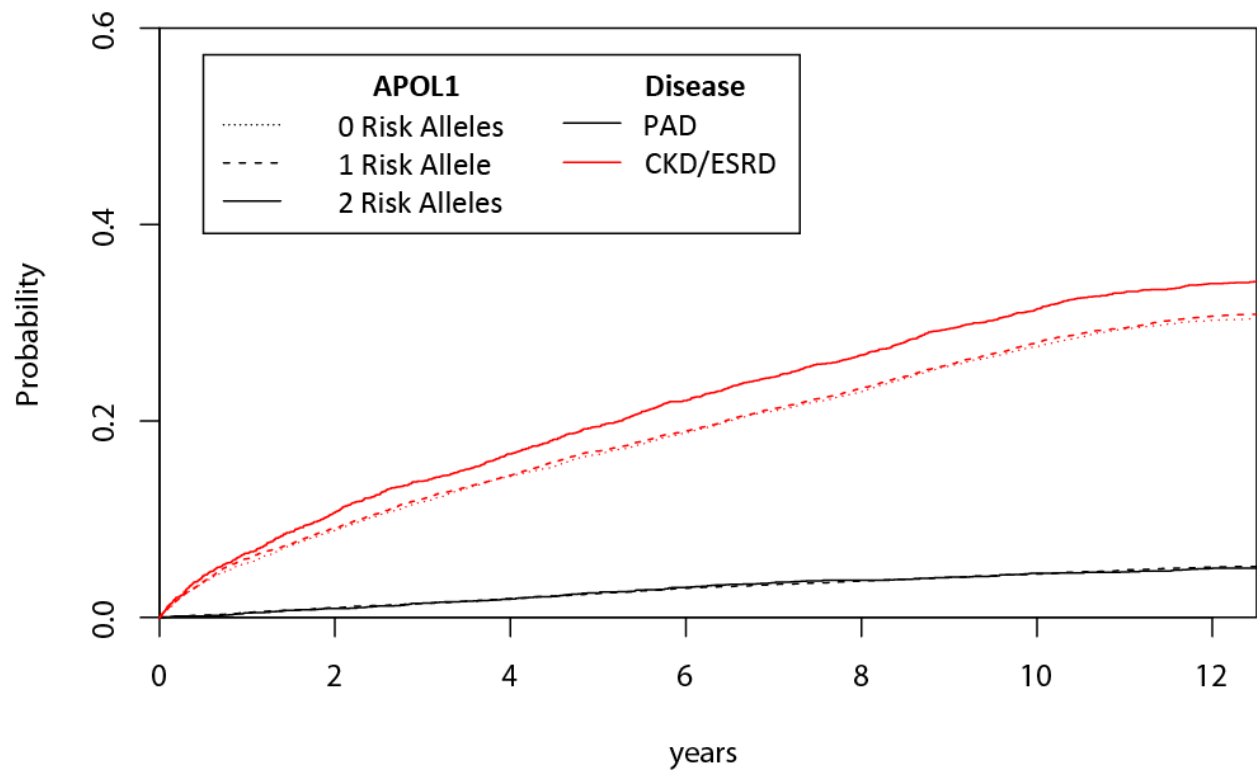

**Supplemental Figure 3.** Cumulative incidence function estimates from competing risks modeling of PAD and CKD/ESRD outcomes.

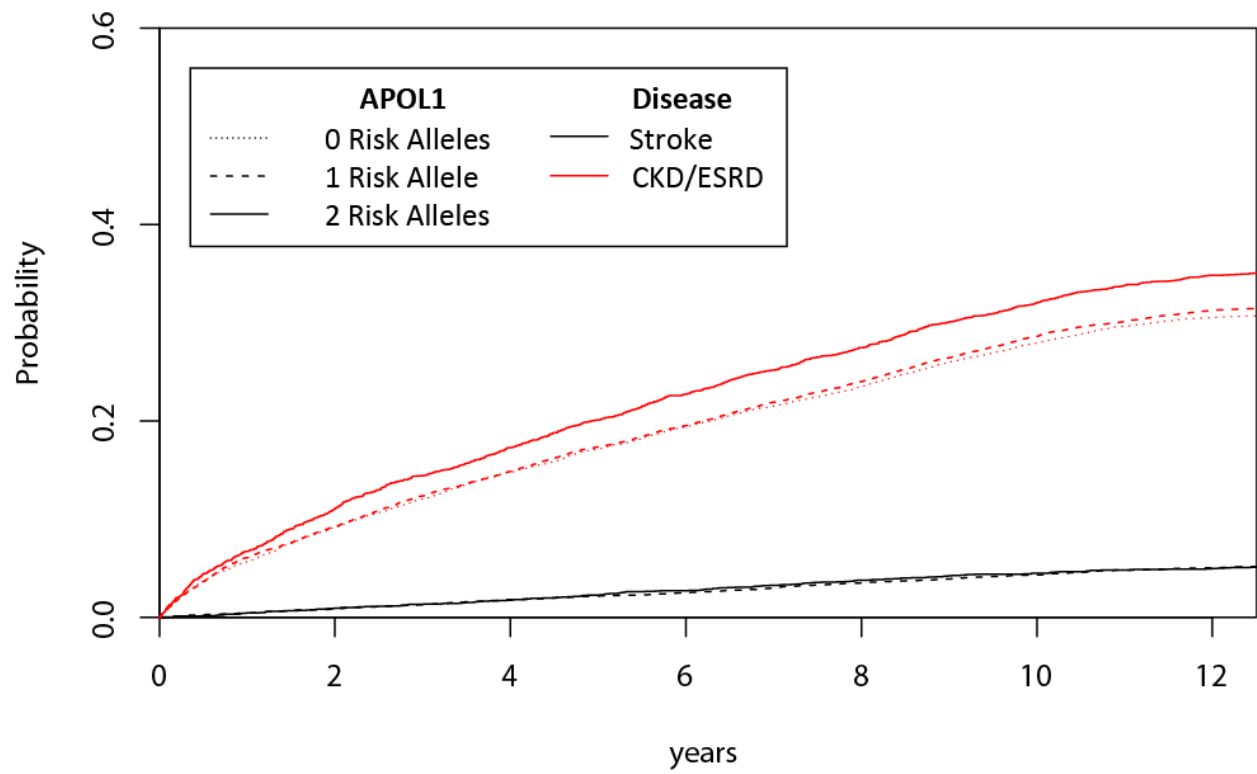

**Supplemental Figure 4.** Cumulative incidence function estimates from competing risks modeling of Stroke and CKD/ESRD outcomes.

**Supplemental Table 1. Association of *APOL1* and cardiovascular disease previously reported in the literature**

| Cohort                                     |          |                 |                     | Reported Cardiovascular Association |       |          | Reported Cohort Characteristics |               |         |        |
|--------------------------------------------|----------|-----------------|---------------------|-------------------------------------|-------|----------|---------------------------------|---------------|---------|--------|
| Paper*                                     | Cohort   | N High risk (2) | N Low risk (0 or 1) | Endpoint                            | OR/HR | P        | Diabetes                        | Hyper-tension | Smoking | Female |
| Ito, Circ Res 2013 <sup>1</sup>            | JHS      | 284             | 783                 | MI/ Stroke/ cardiac revasc          | 2.2   | 9.00E-04 | 23%                             | 70%           | 13%     | 62%    |
|                                            | WHI      | 103             | 646                 | MI/Stroke/ cardiac revasc           | 2     | 8.00E-03 | 20%                             | 57%           | 12%     | 100%   |
| Langefeld, KI 2015 <sup>2</sup>            | SPRINT   | 361             | 2210                | MI/coronary & carotid revasc        | 1.16  | 0.46     | 0%                              | 100%          | 24%     | 46%    |
| Mukamal, ATVB 2016 <sup>3</sup>            | CHS      | 91              | 707                 | MI                                  | 1.8   | 0.02     | 26%                             | 69%           | 14%     | 53%    |
| Grams, JASN 2016 <sup>4</sup>              | ARIC     | 470             | 3206                | MI/cardiac revasc/ stroke/HF        | 1.04  | -        | 17%                             | 55%           | 30%     | 54%    |
| Chen, ATVB 2017 <sup>5</sup>               | AASK     | 160             | 533                 | MI/cardiac revasc/ stroke/HF        | 1.23  | 0.31     | 0%                              | 100%          | 42%     | 40%    |
| Chen, JAHA 2017 <sup>6</sup>               | MESA     | 213             | 1533                | Incident CAD (MI/angina/ death)     | 1     | -        | 25%                             | 59%           | 18%     | 55%    |
|                                            |          |                 |                     | Incident MI                         | 1.24  | -        |                                 |               |         |        |
| Wang, Cardiorenal med 2017 <sup>7</sup>    | CATH GEN | 231             | 1410                | prevalent CAD                       | 1.02  | -        | 39%                             | 75%           | 44%     | 46%    |
| Gutiérrez, Circ GPM 2018 <sup>8</sup>      | REGARDS  | 9259            | 1346                | Incident CHD or ischemic stroke     | 1.15  | -        | 30%                             | 68%           | 18%     | 62%    |
| Franceschini, JAMA Card. 2018 <sup>9</sup> | WHI      | 9767            | 1370                | Incident CHD                        | 1.13  | -        | 13%                             | 55%           | 51%     | 100%   |

JHS, Jackson Heart Study; WHI, Women's Health Initiative; SPRINT, Systolic Blood Pressure Intervention Trial; CHS, Cardiovascular Health Study; ARIC, Atherosclerotic Risk in the Community Study; AASK, African American Study of Kidney Disease and Hypertension; MESA, Multi-Ethnic Study of Atherosclerosis; CATH GEN, Duke Catheterization Genetics Study. \*Please see Supplemental References for complete citation.

**Supplemental Table 2. Diagnosis, procedure, and laboratory code components of coronary artery disease, end stage renal disease and peripheral artery disease definition in Million Veterans Project Cohort**

|     | <b>System</b> | <b>Code</b> | <b>Diagnosis</b>                                                                                                                                                                                                                                                                                        |
|-----|---------------|-------------|---------------------------------------------------------------------------------------------------------------------------------------------------------------------------------------------------------------------------------------------------------------------------------------------------------|
| CAD | ICD9          | 410         | Acute myocardial infarction                                                                                                                                                                                                                                                                             |
| CAD | ICD10         | I21         | Acute myocardial infarction                                                                                                                                                                                                                                                                             |
| CAD | ICD10         | I22         | Subsequent ST elevation (STEMI) and non-ST elevation (NSTEMI) myocardial infarction                                                                                                                                                                                                                     |
| CAD | ICD9          | 0.66        | Percutaneous transluminal coronary angioplasty [PTCA] or coronary atherectomy                                                                                                                                                                                                                           |
| CAD | ICD9          | 36          | Operations On Vessels Of Heart                                                                                                                                                                                                                                                                          |
| CAD | ICD9          | 36.01       | Single vessel percutaneous transluminal coronary angioplasty [PTCA] or coronary atherectomy without mention of thrombolytic agent                                                                                                                                                                       |
| CAD | ICD9          | 36.02       | Single vessel percutaneous transluminal coronary angioplasty [PTCA] or coronary atherectomy with mention of thrombolytic agent                                                                                                                                                                          |
| CAD | ICD9          | 36.03       | Open chest coronary artery angioplasty                                                                                                                                                                                                                                                                  |
| CAD | ICD9          | 36.04       | Intracoronary artery thrombolytic infusion                                                                                                                                                                                                                                                              |
| CAD | ICD9          | 36.05       | Multiple vessel percutaneous transluminal coronary angioplasty [PTCA] or coronary atherectomy performed during the same operation, with or without mention of thrombolytic agent                                                                                                                        |
| CAD | ICD9          | 36.06       | Insertion of non-drug-eluting coronary artery stent(s)                                                                                                                                                                                                                                                  |
| CAD | ICD9          | 36.07       | Insertion of drug-eluting coronary artery stent(s)                                                                                                                                                                                                                                                      |
| CAD | ICD9          | 36.09       | Other removal of coronary artery obstruction                                                                                                                                                                                                                                                            |
| CAD | ICD9          | 36.1        | Bypass Anastomosis For Heart Revascularization                                                                                                                                                                                                                                                          |
| CAD | ICD9          | 36.11       | (Aorto)coronary bypass of one coronary artery                                                                                                                                                                                                                                                           |
| CAD | ICD9          | 36.12       | (Aorto)coronary bypass of two coronary arteries                                                                                                                                                                                                                                                         |
| CAD | ICD9          | 36.13       | (Aorto)coronary bypass of three coronary arteries                                                                                                                                                                                                                                                       |
| CAD | ICD9          | 36.14       | (Aorto)coronary bypass of four or more coronary arteries                                                                                                                                                                                                                                                |
| CAD | ICD9          | 36.15       | Single internal mammary-coronary artery bypass                                                                                                                                                                                                                                                          |
| CAD | ICD9          | 36.16       | Double internal mammary-coronary artery bypass                                                                                                                                                                                                                                                          |
| CAD | ICD9          | 36.17       | Abdominal-coronary artery bypass                                                                                                                                                                                                                                                                        |
| CAD | ICD9          | 36.19       | Other bypass anastomosis for heart revascularization                                                                                                                                                                                                                                                    |
| CAD | ICD9          | 36.2        | Heart revascularization by arterial implant                                                                                                                                                                                                                                                             |
| CAD | ICD9          | 99.1        | Injection or infusion of thrombolytic agent                                                                                                                                                                                                                                                             |
| CAD | ICD10         | 210         | Coronary Artery, Single                                                                                                                                                                                                                                                                                 |
| CAD | ICD10         | 211         | Coronary Artery, Two Arteries                                                                                                                                                                                                                                                                           |
| CAD | ICD10         | 212         | Coronary Artery, Three Arteries                                                                                                                                                                                                                                                                         |
| CAD | ICD10         | 213         | Coronary Artery, Four or More Arteries                                                                                                                                                                                                                                                                  |
| CAD | ICD10         | 270         | Coronary Artery, One Artery                                                                                                                                                                                                                                                                             |
| CAD | ICD10         | 271         | Coronary Artery, Two Arteries                                                                                                                                                                                                                                                                           |
| CAD | ICD10         | 272         | Coronary Artery, Three Arteries                                                                                                                                                                                                                                                                         |
| CAD | ICD10         | 273         | Coronary Artery, Four or More Arteries                                                                                                                                                                                                                                                                  |
| CAD | ICD10         | 02C0        | Coronary Artery, One Artery                                                                                                                                                                                                                                                                             |
| CAD | ICD10         | 02C1        | Coronary Artery, Two Arteries                                                                                                                                                                                                                                                                           |
| CAD | ICD10         | 02C3        | Coronary Artery, Three Arteries                                                                                                                                                                                                                                                                         |
| CAD | ICD10         | 02C4        | Coronary Artery, Four or More Arteries                                                                                                                                                                                                                                                                  |
| CAD | CPT           | 92928       | Percutaneous transcatheter placement of intracoronary stent(s), with coronary angioplasty when performed; single major coronary artery or branch                                                                                                                                                        |
| CAD | CPT           | 92933       | Percutaneous transluminal coronary atherectomy, with intracoronary stent, with coronary angioplasty when performed; single major coronary artery or branch                                                                                                                                              |
| CAD | CPT           | 92929       | Percutaneous transcatheter placement of intracoronary stent(s), with coronary angioplasty when performed; each additional branch of a major coronary artery                                                                                                                                             |
| CAD | CPT           | 92934       | Percutaneous transluminal coronary atherectomy, with intracoronary stent, with coronary angioplasty when performed; each additional branch of a major coronary artery                                                                                                                                   |
| CAD | CPT           | 92937       | Percutaneous transluminal revascularization of or through coronary artery bypass graft (internal mammary, free arterial, venous), any combination of intracoronary stent, atherectomy and angioplasty, including distal protection when performed; single vessel                                        |
| CAD | CPT           | 92938       | Percutaneous transluminal revascularization of or through coronary artery bypass graft (internal mammary, free arterial, venous), any combination of intracoronary stent, atherectomy and angioplasty, including distal protection when performed; each additional branch subtended by the bypass graft |
| CAD | CPT           | 92941       | Percutaneous transluminal revascularization of acute total/subtotal occlusion during acute myocardial infarction, coronary artery or coronary artery bypass graft, any combination of intracoronary stent, atherectomy and angioplasty, including aspiration thrombectomy when performed, single vessel |
| CAD | CPT           | 92943       | Percutaneous transluminal revascularization of chronic total occlusion, coronary artery, coronary artery branch, or coronary artery bypass graft, any combination of intracoronary stent, atherectomy and angioplasty; single vessel                                                                    |
| CAD | CPT           | 92944       | Percutaneous transluminal revascularization of chronic total occlusion, coronary artery, coronary artery branch, or coronary artery bypass graft, any combination of intracoronary stent, atherectomy and angioplasty; each additional coronary artery, coronary artery branch, or bypass graft         |

|     |      |        |                                                                                                                                                                                                                                                                 |
|-----|------|--------|-----------------------------------------------------------------------------------------------------------------------------------------------------------------------------------------------------------------------------------------------------------------|
| CAD | CPT  | G0290  | Transcatheter placement of a drug eluting intracoronary stent(s), percutaneous, with or without other therapeutic intervention, any method; single vessel                                                                                                       |
| CAD | CPT  | G0291  | Transcatheter placement of a drug eluting intracoronary stent(s), percutaneous, with or without other therapeutic intervention, any method; each additional vessel                                                                                              |
| CAD | CPT  | C9600  | Percutaneous transcatheter placement of drug eluting intracoronary stent(s), with coronary angioplasty when performed; single major coronary artery or branch                                                                                                   |
| CAD | CPT  | C9601  | Percutaneous transcatheter placement of drug-eluting intracoronary stent(s), with coronary angioplasty when performed; each additional branch of a major coronary artery (list separately in addition to code for primary procedure)                            |
| CAD | CPT  | C9602  | Percutaneous transluminal coronary atherectomy, with drug eluting intracoronary stent, with coronary angioplasty when performed; single major coronary artery or branch                                                                                         |
| CAD | CPT  | C9603  | Percutaneous transluminal coronary atherectomy, with drug-eluting intracoronary stent, with coronary angioplasty when performed; each additional branch of a major coronary artery (list separately in addition to code for primary procedure)                  |
| CAD | CPT  | C9604  | Percutaneous transluminal revascularization of or through coronary artery bypass graft (internal mammary, free arterial, venous), any combination of drug-eluting intracoronary stent, atherectomy and angioplasty, including distal protection when performed  |
| CAD | CPT  | C9605  | Percutaneous transluminal revascularization of or through coronary artery bypass graft (internal mammary, free arterial, venous), any combination of drug-eluting intracoronary stent, atherectomy and angioplasty, including distal protection when performed  |
| CAD | CPT  | C9606  | Percutaneous transluminal revascularization of acute total/subtotal occlusion during acute myocardial infarction, coronary artery or coronary artery bypass graft, any combination of drug-eluting intracoronary stent, atherectomy and angioplasty, including  |
| CAD | CPT  | C9607  | Percutaneous transluminal revascularization of chronic total occlusion, coronary artery, coronary artery branch, or coronary artery bypass graft, any combination of drug-eluting intracoronary stent, atherectomy and angioplasty; single vessel               |
| CAD | CPT  | C9608  | Percutaneous transluminal revascularization of chronic total occlusion, coronary artery, coronary artery branch, or coronary artery bypass graft, any combination of drug-eluting intracoronary stent, atherectomy and angioplasty; each additional coronary ar |
| CAD | CPT  | 92973  | Percutaneous transluminal coronary thrombectomy mechanical                                                                                                                                                                                                      |
| CAD | CPT  | 92974  | Transcatheter placement of radiation delivery device for subsequent coronary intravascular brachytherapy                                                                                                                                                        |
| CAD | CPT  | 92975  | Thrombolysis, coronary; by intracoronary infusion, including selective coronary angiography                                                                                                                                                                     |
| CAD | CPT  | 92977  | Thrombolysis, coronary; by intravenous infusion                                                                                                                                                                                                                 |
| CAD | CPT  | 92980  | Transcatheter placement of an intracoronary stent(s), percutaneous, with or without other therapeutic intervention, any method; single vessel                                                                                                                   |
| CAD | CPT  | 92981  | (Transcatheter placement of an intracoronary stent(s), percutaneous, with or without other therapeutic intervention, any method; each additional vessel                                                                                                         |
| CAD | CPT  | 92982  | Percutaneous transluminal coronary balloon angioplasty, single vessel                                                                                                                                                                                           |
| CAD | CPT  | 92984  | Percutaneous transluminal coronary balloon angioplasty, each additional vessel                                                                                                                                                                                  |
| CAD | CPT  | 92995  | Percutaneous transluminal coronary atherectomy, with or without balloon angioplasty, initial vessel                                                                                                                                                             |
| CAD | CPT  | 92996  | Percutaneous transluminal coronary atherectomy, each additional vessel                                                                                                                                                                                          |
| CAD | CPT  | 33510  | Coronary artery bypass, vein only; single coronary venous graft                                                                                                                                                                                                 |
| CAD | CPT  | 33511  | Coronary artery bypass, vein only; two coronary venous grafts                                                                                                                                                                                                   |
| CAD | CPT  | 33512  | Coronary artery bypass, vein only; three coronary venous grafts                                                                                                                                                                                                 |
| CAD | CPT  | 33513  | Coronary artery bypass, vein only; four coronary venous grafts                                                                                                                                                                                                  |
| CAD | CPT  | 33514  | Coronary artery bypass, vein only; five coronary venous grafts                                                                                                                                                                                                  |
| CAD | CPT  | 33516  | Coronary artery bypass, vein only; six or more coronary venous grafts                                                                                                                                                                                           |
| CAD | CPT  | 33517  | Coronary artery bypass, using venous graft(s) and arterial graft(s); single vein graft                                                                                                                                                                          |
| CAD | CPT  | 33518  | Coronary artery bypass, using venous graft(s) and arterial graft(s); two venous grafts                                                                                                                                                                          |
| CAD | CPT  | 33519  | Coronary artery bypass, using venous graft(s) and arterial graft(s); three venous grafts                                                                                                                                                                        |
| CAD | CPT  | 33521  | Coronary artery bypass, using venous graft(s) and arterial graft(s); four venous grafts                                                                                                                                                                         |
| CAD | CPT  | 33522  | Coronary artery bypass, using venous graft(s) and arterial graft(s); five venous grafts                                                                                                                                                                         |
| CAD | CPT  | 33523  | Coronary artery bypass, using venous graft(s) and arterial graft(s); six or more venous grafts                                                                                                                                                                  |
| CAD | CPT  | 33530  | Reoperation, coronary artery bypass procedure or valve procedure, more than one month after original operation                                                                                                                                                  |
| CAD | CPT  | 33533  | Coronary artery bypass, using arterial graft(s); single arterial graft                                                                                                                                                                                          |
| CAD | CPT  | 33534  | Coronary artery bypass, using arterial graft(s); two coronary arterial grafts                                                                                                                                                                                   |
| CAD | CPT  | 33535  | Coronary artery bypass, using arterial graft(s); three coronary arterial grafts                                                                                                                                                                                 |
| CAD | CPT  | 33536  | Coronary artery bypass, using arterial graft(s); four or more coronary arterial grafts                                                                                                                                                                          |
| CAD | CPT  | 33572  | Coronary endarterectomy, open, any method, of left anterior descending, circumflex, or right coronary artery performed in conjunction with coronary artery bypass graft procedure, each vessel                                                                  |
| CAD | ICD9 | 410    | Acute myocardial infarction                                                                                                                                                                                                                                     |
| CAD | ICD9 | 411    | Other acute and subacute forms of ischemic heart disease                                                                                                                                                                                                        |
| CAD | ICD9 | 411.1  | Intermediate coronary syndrome                                                                                                                                                                                                                                  |
| CAD | ICD9 | 411.81 | Acute coronary occlusion without myocardial infarction                                                                                                                                                                                                          |
| CAD | ICD9 | 411.89 | Other acute and subacute forms of ischemic heart disease, other                                                                                                                                                                                                 |
| CAD | ICD9 | 412    | Old myocardial infarction                                                                                                                                                                                                                                       |
| CAD | ICD9 | 414    | Other forms of chronic ischemic heart disease                                                                                                                                                                                                                   |
| CAD | ICD9 | 414.01 | Coronary atherosclerosis of native coronary artery                                                                                                                                                                                                              |



|      |       |         |                                                                                                                                                                                                                                            |
|------|-------|---------|--------------------------------------------------------------------------------------------------------------------------------------------------------------------------------------------------------------------------------------------|
| CAD  | ICD9  | 414.02  | Coronary atherosclerosis of autologous vein bypass graft                                                                                                                                                                                   |
| CAD  | ICD9  | 414.03  | Coronary atherosclerosis of nonautologous biological bypass graft                                                                                                                                                                          |
| CAD  | ICD9  | 414.04  | Coronary atherosclerosis of artery bypass graft                                                                                                                                                                                            |
| CAD  | ICD9  | 414.05  | Coronary atherosclerosis of unspecified bypass graft                                                                                                                                                                                       |
| CAD  | ICD9  | 414.2   | Chronic total occlusion of coronary artery                                                                                                                                                                                                 |
| CAD  | ICD9  | 414.3   | Coronary atherosclerosis due to lipid rich plaque                                                                                                                                                                                          |
| CAD  | ICD9  | 414.4   | Coronary atherosclerosis due to calcified coronary lesion                                                                                                                                                                                  |
| CAD  | ICD9  | 414.8   | Other specified forms of chronic ischemic heart disease                                                                                                                                                                                    |
| CAD  | ICD9  | 414.9   | Chronic ischemic heart disease, unspecified                                                                                                                                                                                                |
| CAD  | ICD9  | V45.81  | Aortocoronary bypass status                                                                                                                                                                                                                |
| CAD  | ICD9  | V45.82  | Percutaneous transluminal coronary angioplasty status                                                                                                                                                                                      |
| CAD  | ICD10 | I21     | ST elevation (STEMI) and non-ST elevation (NSTEMI) myocardial infarction                                                                                                                                                                   |
| CAD  | ICD10 | I22     | Subsequent ST elevation (STEMI) and non-ST elevation (NSTEMI) myocardial infarction                                                                                                                                                        |
| CAD  | ICD10 | I23     | Certain current complications following ST elevation (STEMI) and non-ST elevation (NSTEMI) myocardial infarction (within the 28 day period)                                                                                                |
| CAD  | ICD10 | I24     | Other acute ischemic heart diseases                                                                                                                                                                                                        |
| CAD  | ICD10 | I25.1   | Atherosclerotic heart disease of native coronary artery                                                                                                                                                                                    |
| CAD  | ICD10 | I25.2   | Old myocardial infarction                                                                                                                                                                                                                  |
| CAD  | ICD10 | I25.5   | Ischemic cardiomyopathy                                                                                                                                                                                                                    |
| CAD  | ICD10 | I25.6   | Silent myocardial ischemia                                                                                                                                                                                                                 |
| CAD  | ICD10 | I25.70  | Atherosclerosis of coronary artery bypass graft(s), unspecified, with angina pectoris                                                                                                                                                      |
| CAD  | ICD10 | I25.71  | Atherosclerosis of autologous vein coronary artery bypass graft(s) with angina pectoris                                                                                                                                                    |
| CAD  | ICD10 | I25.72  | Atherosclerosis of autologous artery coronary artery bypass graft(s) with angina pectoris                                                                                                                                                  |
| CAD  | ICD10 | I25.73  | Atherosclerosis of nonautologous biological coronary artery bypass graft(s) with angina pectoris                                                                                                                                           |
| CAD  | ICD10 | I25.79  | Atherosclerosis of other coronary artery bypass graft(s) with angina pectoris                                                                                                                                                              |
| CAD  | ICD10 | I25.810 | Atherosclerosis of coronary artery bypass graft(s) without angina pectoris                                                                                                                                                                 |
| CAD  | ICD10 | I25.82  | Chronic total occlusion of coronary artery                                                                                                                                                                                                 |
| CAD  | ICD10 | I25.83  | Coronary atherosclerosis due to lipid rich plaque                                                                                                                                                                                          |
| CAD  | ICD10 | I25.84  | Coronary atherosclerosis due to calcified coronary lesion                                                                                                                                                                                  |
| CAD  | ICD10 | I25.89  | Other forms of chronic ischemic heart disease                                                                                                                                                                                              |
| CAD  | ICD10 | I25.9   | Chronic ischemic heart disease, unspecified                                                                                                                                                                                                |
| CAD  | ICD10 | Z95.1   | Presence of aortocoronary bypass graft                                                                                                                                                                                                     |
| CAD  | ICD10 | Z98.61  | Coronary angioplasty status                                                                                                                                                                                                                |
| CAD  | ICD10 | I20.0   | Unstable angina                                                                                                                                                                                                                            |
| ESRD | ICD10 | T86.10  | UNSPECIFIED COMPLICATION OF KIDNEY TRANSPLANT                                                                                                                                                                                              |
| ESRD | ICD10 | T86.12  | KIDNEY TRANSPLANT FAILURE                                                                                                                                                                                                                  |
| ESRD | ICD10 | Z94.0   | KIDNEY TRANSPLANT STATUS                                                                                                                                                                                                                   |
| ESRD | ICD10 | T86.11  | KIDNEY TRANSPLANT REJECTION                                                                                                                                                                                                                |
| ESRD | ICD9  | 996.81  | COMPLICATIONS OF TRANSPLANTED KIDNEY                                                                                                                                                                                                       |
| ESRD | ICD9  | V42.0   | KIDNEY REPLACED BY TRANSPLANT                                                                                                                                                                                                              |
| ESRD | CPT   | 50360   | RENAL ALLOTRANSPLANTATION, IMPLANTATION OF GRAFT; WITHOUT RECIPIENT NEPHRECTOMY                                                                                                                                                            |
| ESRD | CPT   | 50365   | RENAL ALLOTRANSPLANTATION, IMPLANTATION OF GRAFT; WITH RECIPIENT NEPHRECTOMY                                                                                                                                                               |
| ESRD | CPT   | 50380   | RENAL AUTOTRANSPLANTATION, REIMPLANTATION OF KIDNEY                                                                                                                                                                                        |
| ESRD | ICD9  | 55.61   | RENAL AUTOTRANSPLANTATION                                                                                                                                                                                                                  |
| ESRD | ICD9  | 55.69   | OTHER KIDNEY TRANSPLANTATION                                                                                                                                                                                                               |
| ESRD | ICD10 | OTS00ZZ | REPOSITION RIGHT KIDNEY, OPEN APPROACH                                                                                                                                                                                                     |
| ESRD | ICD10 | OTS10ZZ | REPOSITION LEFT KIDNEY, OPEN APPROACH                                                                                                                                                                                                      |
| ESRD | ICD10 | Z49.31  | ENCOUNTER FOR ADEQUACY TESTING FOR HEMODIALYSIS                                                                                                                                                                                            |
| ESRD | ICD10 | Z99.2   | DEPENDENCE ON RENAL DIALYSIS                                                                                                                                                                                                               |
| ESRD | ICD9  | V45.11  | RENAL DIALYSIS STATUS                                                                                                                                                                                                                      |
| ESRD | ICD9  | V56.0   | AFTERCARE INVOLVING EXTRACORPOREAL DIALYSIS                                                                                                                                                                                                |
| ESRD | CPT   | 90920   | END STAGE RENAL DISEASE (ESRD) RELATED SERVICES PER FULL MONTH; FOR PATIENTS BETWEEN TWELVE AND NINETEEN YEARS OF AGE TO INCLUDE MONITORING FOR THE ADEQUACY OF NUTRITION, ASSESSMENT OF GROWTH AND DEVELOPMENT, AND COUNSELING OF PARENTS |
| ESRD | CPT   | 90921   | END STAGE RENAL DISEASE (ESRD) RELATED SERVICES PER FULL MONTH; FOR PATIENTS TWENTY YEARS OF AGE AND OVER                                                                                                                                  |
| ESRD | CPT   | 90924   | END STAGE RENAL DISEASE (ESRD) RELATED SERVICES (LESS THAN FULL MONTH), PER DAY; FOR PATIENTS BETWEEN TWELVE AND NINETEEN YEARS OF AGE                                                                                                     |
| ESRD | CPT   | 90925   | END STAGE RENAL DISEASE (ESRD) RELATED SERVICES (LESS THAN FULL MONTH), PER DAY; FOR PATIENTS TWENTY YEARS OF AGE AND OVER                                                                                                                 |
| ESRD | CPT   | 90935   | HEMODIALYSIS PROCEDURE WITH SINGLE PHYSICIAN EVALUATION                                                                                                                                                                                    |
| ESRD | CPT   | 90937   | HEMODIALYSIS PROCEDURE REQUIRING REPEATED EVALUATION(S) WITH OR WITHOUT SUBSTANTIAL REVISION OF DIALYSIS PRESCRIPTION                                                                                                                      |
| ESRD | CPT   | 90945   | DIALYSIS PROCEDURE OTHER THAN HEMODIALYSIS (EG, PERITONEAL DIALYSIS, HEMOFILTRATION, OR OTHER CONTINUOUS RENAL REPLACEMENT THERAPIES), WITH SINGLE PHYSICIAN EVALUATION                                                                    |

|      |       |         |                                                                                                                                                                                                                                               |
|------|-------|---------|-----------------------------------------------------------------------------------------------------------------------------------------------------------------------------------------------------------------------------------------------|
| ESRD | CPT   | 90947   | DIALYSIS PROCEDURE OTHER THAN HEMODIALYSIS (EG, PERITONEAL DIALYSIS, HEMOFILTRATION, OR OTHER CONTINUOUS RENAL REPLACEMENT THERAPIES) REQUIRING REPEATED PHYSICIAN EVALUATIONS, WITH OR WITHOUT SUBSTANTIAL REVISION OF DIALYSIS PRESCRIPTION |
| ESRD | CPT   | 90960   | END-STAGE RENAL DISEASE (ESRD) RELATED SERVICES MONTHLY, FOR PATIENTS 20 YEARS OF AGE AND OLDER; WITH 4 OR MORE FACE-TO-FACE PHYSICIAN VISITS PER MONTH                                                                                       |
| ESRD | CPT   | 90961   | END-STAGE RENAL DISEASE (ESRD) RELATED SERVICES MONTHLY, FOR PATIENTS 20 YEARS OF AGE AND OLDER; WITH 2-3 FACE-TO-FACE PHYSICIAN VISITS PER MONTH                                                                                             |
| ESRD | CPT   | 90962   | END-STAGE RENAL DISEASE (ESRD) RELATED SERVICES MONTHLY, FOR PATIENTS 20 YEARS OF AGE AND OLDER; WITH 1 FACE-TO-FACE PHYSICIAN VISIT PER MONTH                                                                                                |
| ESRD | CPT   | 90966   | END-STAGE RENAL DISEASE (ESRD) RELATED SERVICES FOR HOME DIALYSIS PER FULL MONTH, FOR PATIENTS 20 YEARS OF AGE AND OLDER                                                                                                                      |
| ESRD | CPT   | 90970   | END-STAGE RENAL DISEASE (ESRD) RELATED SERVICES FOR DIALYSIS LESS THAN A FULL MONTH OF SERVICE, PER DAY; FOR PATIENTS 20 YEARS OF AGE AND OLDER                                                                                               |
| ESRD | CPT   | 90989   | DIALYSIS TRAINING, PATIENT, INCLUDING HELPER WHERE APPLICABLE, ANY MODE, COMPLETED COURSE                                                                                                                                                     |
| ESRD | CPT   | 90993   | DIALYSIS TRAINING, PATIENT, INCLUDING HELPER WHERE APPLICABLE, ANY MODE, COURSE NOT COMPLETED, PER TRAINING SESSION                                                                                                                           |
| ESRD | CPT   | 90999   | UNLISTED DIALYSIS PROCEDURE, INPATIENT OR OUTPATIENT                                                                                                                                                                                          |
| ESRD | CPT   | 99512   | HOME VISIT FOR HEMODIALYSIS                                                                                                                                                                                                                   |
| ESRD | ICD9  | 39.93   | INSERTION OF VESSEL-TO-VESSEL CANNULA                                                                                                                                                                                                         |
| ESRD | ICD9  | 39.95   | HEMODIALYSIS                                                                                                                                                                                                                                  |
| ESRD | ICD9  | 54.98   | PERITONEAL DIALYSIS                                                                                                                                                                                                                           |
| ESRD | ICD10 | 03170JD | BYPASS RIGHT BRACHIAL ARTERY TO UPPER ARM VEIN WITH SYNTHETIC SUBSTITUTE, OPEN APPROACH                                                                                                                                                       |
| ESRD | ICD10 | 031C0JF | BYPASS LEFT RADIAL ARTERY TO LOWER ARM VEIN WITH SYNTHETIC SUBSTITUTE, OPEN APPROACH                                                                                                                                                          |
| ESRD | ICD10 | 031A0JF | BYPASS LEFT ULNAR ARTERY TO LOWER ARM VEIN WITH SYNTHETIC SUBSTITUTE, OPEN APPROACH                                                                                                                                                           |
| ESRD | ICD10 | 03130JD | BYPASS RIGHT SUBCLAVIAN ARTERY TO UPPER ARM VEIN WITH SYNTHETIC SUBSTITUTE, OPEN APPROACH                                                                                                                                                     |
| ESRD | ICD10 | 031B0JF | BYPASS RIGHT RADIAL ARTERY TO LOWER ARM VEIN WITH SYNTHETIC SUBSTITUTE, OPEN APPROACH                                                                                                                                                         |
| ESRD | ICD10 | 03140JD | BYPASS LEFT SUBCLAVIAN ARTERY TO UPPER ARM VEIN WITH SYNTHETIC SUBSTITUTE, OPEN APPROACH                                                                                                                                                      |
| ESRD | ICD10 | 03150JD | BYPASS RIGHT AXILLARY ARTERY TO UPPER ARM VEIN WITH SYNTHETIC SUBSTITUTE, OPEN APPROACH                                                                                                                                                       |
| ESRD | ICD10 | 03160JD | BYPASS LEFT AXILLARY ARTERY TO UPPER ARM VEIN WITH SYNTHETIC SUBSTITUTE, OPEN APPROACH                                                                                                                                                        |
| ESRD | ICD10 | 03180JD | BYPASS LEFT BRACHIAL ARTERY TO UPPER ARM VEIN WITH SYNTHETIC SUBSTITUTE, OPEN APPROACH                                                                                                                                                        |
| ESRD | ICD10 | 03190JF | BYPASS RIGHT ULNAR ARTERY TO LOWER ARM VEIN WITH SYNTHETIC SUBSTITUTE, OPEN APPROACH                                                                                                                                                          |
| PAD  | CPT   | 35302   | Thromboendarterectomy, including patch graft, if performed; superficial femoral artery                                                                                                                                                        |
| PAD  | CPT   | 35303   | Thromboendarterectomy, including patch graft, if performed; popliteal artery                                                                                                                                                                  |
| PAD  | CPT   | 35304   | Thromboendarterectomy, including patch graft, if performed; tibioperoneal trunk artery                                                                                                                                                        |
| PAD  | CPT   | 35305   | Thromboendarterectomy, including patch graft, if performed; tibial or peroneal artery, initial vessel                                                                                                                                         |
| PAD  | CPT   | 35306   | Thromboendarterectomy, including patch graft, if performed; each additional tibial or peroneal artery (List separately in addition to code for primary procedure)                                                                             |
| PAD  | CPT   | 35331   | Thromboendarterectomy, including patch graft, if performed; abdominal aorta                                                                                                                                                                   |
| PAD  | CPT   | 35351   | Thromboendarterectomy, including patch graft, if performed; iliac                                                                                                                                                                             |
| PAD  | CPT   | 35355   | Thromboendarterectomy, including patch graft, if performed; iliofemoral                                                                                                                                                                       |
| PAD  | CPT   | 35361   | Thromboendarterectomy, including patch graft, if performed; combined aortoiliac                                                                                                                                                               |
| PAD  | CPT   | 35363   | Thromboendarterectomy, including patch graft, if performed; combined aortoiliofemoral                                                                                                                                                         |
| PAD  | CPT   | 35371   | Thromboendarterectomy, including patch graft, if performed; common femoral                                                                                                                                                                    |
| PAD  | CPT   | 35372   | Thromboendarterectomy, including patch graft, if performed; deep (profunda) femoral                                                                                                                                                           |
| PAD  | CPT   | 35452   | Transluminal balloon angioplasty, open; aortic                                                                                                                                                                                                |
| PAD  | CPT   | 35454   | Transluminal balloon angioplasty, open; iliac                                                                                                                                                                                                 |
| PAD  | CPT   | 35456   | Transluminal balloon angioplasty, open; femoral-popliteal                                                                                                                                                                                     |
| PAD  | CPT   | 35459   | Transluminal balloon angioplasty, open; tibioperoneal trunk and branches                                                                                                                                                                      |
| PAD  | CPT   | 35470   | Transluminal balloon angioplasty, percutaneous; tibioperoneal trunk or branches, each vessel                                                                                                                                                  |
| PAD  | CPT   | 35472   | Transluminal balloon angioplasty, percutaneous; aortic                                                                                                                                                                                        |
| PAD  | CPT   | 35473   | Transluminal balloon angioplasty, percutaneous; iliac                                                                                                                                                                                         |
| PAD  | CPT   | 35474   | Transluminal balloon angioplasty, percutaneous; femoral-popliteal                                                                                                                                                                             |
| PAD  | CPT   | 35481   | Transluminal peripheral atherectomy, open; aortic                                                                                                                                                                                             |
| PAD  | CPT   | 35482   | Transluminal peripheral atherectomy, open; iliac                                                                                                                                                                                              |
| PAD  | CPT   | 35483   | Transluminal peripheral atherectomy, open; femoral-popliteal                                                                                                                                                                                  |
| PAD  | CPT   | 35485   | Transluminal peripheral atherectomy, open; tibioperoneal trunk and branches                                                                                                                                                                   |
| PAD  | CPT   | 35491   | Transluminal peripheral atherectomy, percutaneous; aortic                                                                                                                                                                                     |
| PAD  | CPT   | 35492   | Transluminal peripheral atherectomy, percutaneous; iliac                                                                                                                                                                                      |
| PAD  | CPT   | 35493   | Transluminal peripheral atherectomy, percutaneous; femoral-popliteal                                                                                                                                                                          |
| PAD  | CPT   | 35495   | Transluminal peripheral atherectomy, percutaneous; tibioperoneal trunk and branches                                                                                                                                                           |
| PAD  | CPT   | 35521   | Bypass graft, with vein; axillary-femoral                                                                                                                                                                                                     |
| PAD  | CPT   | 35533   | Bypass graft, with vein; axillary-femoral-femoral                                                                                                                                                                                             |
| PAD  | CPT   | 35537   | Bypass graft, with vein; aortoiliac                                                                                                                                                                                                           |
| PAD  | CPT   | 35538   | Bypass graft, with vein; aortobi-iliac                                                                                                                                                                                                        |
| PAD  | CPT   | 35539   | Bypass graft, with vein; aortofemoral                                                                                                                                                                                                         |
| PAD  | CPT   | 35540   | Bypass graft, with vein; aortobifemoral                                                                                                                                                                                                       |

|     |     |        |                                                                                                                                                               |
|-----|-----|--------|---------------------------------------------------------------------------------------------------------------------------------------------------------------|
| PAD | CPT | 35548  | Bypass graft, with vein; aortoiliofemoral, unilateral                                                                                                         |
| PAD | CPT | 35549  | Bypass graft, with vein; aortoiliofemoral, bilateral                                                                                                          |
| PAD | CPT | 35551  | Bypass graft, with vein; aortofemoral-popliteal                                                                                                               |
| PAD | CPT | 35556  | Bypass graft, with vein; femoral-popliteal                                                                                                                    |
| PAD | CPT | 35558  | Bypass graft, with vein; femoral-femoral                                                                                                                      |
| PAD | CPT | 35563  | Bypass graft, with vein; ilioiliac                                                                                                                            |
| PAD | CPT | 35565  | Bypass graft, with vein; iliofemoral                                                                                                                          |
| PAD | CPT | 35566  | Bypass graft, with vein; femoral-anterior tibial, posterior tibial, peroneal artery or other distal vessels                                                   |
| PAD | CPT | 35571  | Bypass graft, with vein; popliteal-tibial, -peroneal artery or other distal vessels                                                                           |
| PAD | CPT | 35583  | In-situ vein bypass; femoral-popliteal                                                                                                                        |
| PAD | CPT | 35585  | In-situ vein bypass; femoral-anterior tibial, posterior tibial, or peroneal artery                                                                            |
| PAD | CPT | 35587  | In-situ vein bypass; popliteal-tibial, peroneal                                                                                                               |
| PAD | CPT | 35621  | Bypass graft, with other than vein; axillary-femoral                                                                                                          |
| PAD | CPT | 35623  | Bypass graft, with other than vein; axillary-popliteal or -tibial                                                                                             |
| PAD | CPT | 35637  | Bypass graft, with other than vein; aortoiliac                                                                                                                |
| PAD | CPT | 35638  | Bypass graft, with other than vein; aortobi-iliac                                                                                                             |
| PAD | CPT | 35646  | Bypass graft, with other than vein; aortobifemoral                                                                                                            |
| PAD | CPT | 35647  | Bypass graft, with other than vein; aortofemoral                                                                                                              |
| PAD | CPT | 35654  | Bypass graft, with other than vein; axillary-femoral-femoral                                                                                                  |
| PAD | CPT | 35656  | Bypass graft, with other than vein; femoral-popliteal                                                                                                         |
| PAD | CPT | 35661  | Bypass graft, with other than vein; femoral-femoral                                                                                                           |
| PAD | CPT | 35663  | Bypass graft, with other than vein; ilioiliac                                                                                                                 |
| PAD | CPT | 35665  | Bypass graft, with other than vein; iliofemoral                                                                                                               |
| PAD | CPT | 35666  | Bypass graft, with other than vein; femoral-anterior tibial, posterior tibial, or peroneal artery                                                             |
| PAD | CPT | 35671  | Bypass graft, with other than vein; popliteal-tibial or -peroneal artery                                                                                      |
| PAD | CPT | 35876  | Thrombectomy of arterial or venous graft (other than hemodialysis graft or fistula); with revision of arterial or venous graft                                |
| PAD | CPT | 35879  | Revision, lower extremity arterial bypass, without thrombectomy, open; with vein patch angioplasty                                                            |
| PAD | CPT | 35881  | Revision, lower extremity arterial bypass, without thrombectomy, open; with segmental vein interposition                                                      |
| PAD | CPT | 35883  | Revision, femoral anastomosis of synthetic arterial bypass graft in groin, open; with nonautogenous patch graft (eg, Dacron, ePTFE, bovine pericardium)       |
| PAD | CPT | 35884  | Revision, femoral anastomosis of synthetic arterial bypass graft in groin, open; with autogenous vein patch graft                                             |
| PAD | CPT | 37220  | Iliac PTA-open or percutaneous initial vessel                                                                                                                 |
| PAD | CPT | 37221  | Iliac stent w PTA                                                                                                                                             |
| PAD | CPT | 37222  | Iliac PTA each additional iliac vessel                                                                                                                        |
| PAD | CPT | 37223  | Iliac stent w PTA each additional iliac vessel                                                                                                                |
| PAD | CPT | 37224  | Fem-pop PTA- open or percut No add on codes                                                                                                                   |
| PAD | CPT | 37225  | Fem-pop w atherectomy includes PTA                                                                                                                            |
| PAD | CPT | 37226  | Fem-pop stent includes PTA                                                                                                                                    |
| PAD | CPT | 37227  | Fem-pop stent w atherectomy includes PTA                                                                                                                      |
| PAD | CPT | 37228  | Tib-peroneal PTA- open or percut initial vessel                                                                                                               |
| PAD | CPT | 37229  | Tib-peroneal atherectomy includes PTA                                                                                                                         |
| PAD | CPT | 37230  | Tib-peroneal stent includes PTA                                                                                                                               |
| PAD | CPT | 37231  | Tib-peroneal stent w atherectomy includes PTA                                                                                                                 |
| PAD | CPT | 37232  | Tib-peroneal PTA each additional vessel                                                                                                                       |
| PAD | CPT | 37233  | Tib-peroneal atherectomy each additional vessel                                                                                                               |
| PAD | CPT | 37234  | Tib-peroneal stent includes PTA each additional vessel                                                                                                        |
| PAD | CPT | 37235  | Tib-peroneal stent w atherectomy includes PTA each additional vessel                                                                                          |
| PAD | CPT | 37205# | Transcatheter placement of an intravascular stent(s) (except coronary, carotid, vertebral, iliac, and lower extremity arteries), percutaneous; initial vessel |
| PAD | CPT | 35381  | Femoral / popliteal / tibioperoneal endarterectomy                                                                                                            |
| PAD | CPT | 35541  | Bypass graft, with vein; aorto-iliac                                                                                                                          |
| PAD | CPT | 35546  | Bypass graft, with vein; aorto-femoral                                                                                                                        |
| PAD | CPT | 35582  | In-situ venin bypass                                                                                                                                          |
| PAD | CPT | 35651  | Bypass graft, other than vein; aortofemoral-popliteal                                                                                                         |
| PAD | CPT | 35226  | Repair of blood vessel, direct; lower extremity                                                                                                               |
| PAD | CPT | 35256  | Repair of blood vessel with vein graft; lower extremity                                                                                                       |
| PAD | CPT | 35286  | Repair of blood vessel with other than vein graft; lower extremity                                                                                            |
| PAD | CPT | 35641  | Bypass graft, other than vein; aortoiliac                                                                                                                     |
| PAD | CPT | 37184# | Percutaneous mechanical thrombectomy, arterial bypass graft, noncoronary                                                                                      |
| PAD | CPT | 37185# | Percutaneous mechanical thrombectomy, arterial bypass graft, noncoronary; second vessel                                                                       |
| PAD | CPT | 37186# | Percutaneous mechanical thrombectomy, arterial bypass graft, noncoronary; non-primary                                                                         |
| PAD | CPT | 37206# | Transcatheter placement of an intravascular stent(s) (except coronary, carotid, vertebral, iliac, and lower extremity arteries), percutaneous; second vessel  |
| PAD | CPT | 37207# | Open placement of an intravascular stent(s) (except coronary, carotid, vertebral, iliac, and lower extremity arteries)                                        |

|     |       |         |                                                                                                                                                          |
|-----|-------|---------|----------------------------------------------------------------------------------------------------------------------------------------------------------|
| PAD | CPT   | 37208#  | Open placement of an intravascular stent(s) (except coronary, carotid, vertebral, iliac, and lower extremity arteries); second vessel                    |
| PAD | CPT   | 27290   | Interpelviabdominal amputation (hindquarter amputation)                                                                                                  |
| PAD | CPT   | 27295   | Disarticulation of hip                                                                                                                                   |
| PAD | CPT   | 27590   | Amputation, thigh, through femur, any level;                                                                                                             |
| PAD | CPT   | 27591   | Amputation, thigh, through femur, any level; immediate fitting technique including first cast                                                            |
| PAD | CPT   | 27592   | Amputation, thigh, through femur, any level; open, circular (guillotine)                                                                                 |
| PAD | CPT   | 27594   | Amputation, thigh, through femur, any level; secondary closure or scar revision                                                                          |
| PAD | CPT   | 27596   | Amputation, thigh, through femur, any level; re-amputation                                                                                               |
| PAD | CPT   | 27598   | Disarticulation at knee                                                                                                                                  |
| PAD | CPT   | 27880   | Amputation, leg, through tibia and fibula;                                                                                                               |
| PAD | CPT   | 27881   | Amputation, leg, through tibia and fibula; with immediate fitting technique including application of first cast                                          |
| PAD | CPT   | 27882   | Amputation, leg, through tibia and fibula; open, circular (guillotine)                                                                                   |
| PAD | CPT   | 27884   | Amputation, leg, through tibia and fibula; secondary closure or scar revision                                                                            |
| PAD | CPT   | 27886   | Amputation, leg, through tibia and fibula; re-amputation                                                                                                 |
| PAD | CPT   | 27888   | Amputation, ankle, through malleoli of tibia and fibula (eg, Syme, Pirogoff type procedures), with plastic closure and resection of nerves               |
| PAD | CPT   | 93923   | Noninvasive physiologic studies of upper or lower extremity arteries, multiple levels or with provocative functional maneuvers, complete bilateral study |
| PAD | CPT   | 93924   | non-invasive physiologic studies of lower extremity arteries, at rest and following treadmill stress testing, complete bilateral study                   |
| PAD | ICD10 | I70.0** | Atherosclerosis of aorta                                                                                                                                 |
| PAD | ICD10 | I70.2** | Atherosclerosis of native arteries of the extremities                                                                                                    |
| PAD | ICD10 | I70.3** | Atherosclerosis of unspecified type of bypass graft(s) of the extremities                                                                                |
| PAD | ICD10 | I70.4** | Atherosclerosis of autologous vein bypass graft(s) of the extremities                                                                                    |
| PAD | ICD10 | I70.5** | Atherosclerosis of nonautologous biological bypass graft(s) of the extremities                                                                           |
| PAD | ICD10 | I70.6** | Atherosclerosis of nonbiological bypass graft(s) of the extremities                                                                                      |
| PAD | ICD10 | I70.7** | Atherosclerosis of other type of bypass graft(s) of the extremities                                                                                      |
| PAD | ICD10 | I70.9** | Other and unspecified atherosclerosis                                                                                                                    |
| PAD | ICD10 | I73.9** | Peripheral vascular disease, unspecified                                                                                                                 |
| PAD | ICD10 | 0470*** | Dilation of Abdominal Aorta                                                                                                                              |
| PAD | ICD10 | 312090  | Bypass Innominate Artery to Right Upper Arm Artery with Autologous Venous Tissue, Open Approach                                                          |
| PAD | ICD10 | 312091  | Bypass Innominate Artery to Left Upper Arm Artery with Autologous Venous Tissue, Open Approach                                                           |
| PAD | ICD10 | 041009B | Bypass Abdominal Aorta to Left Internal Iliac Artery with Autologous Venous Tissue, Open Approach                                                        |
| PAD | ICD10 | 041009C | Bypass Abdominal Aorta to Bilateral Internal Iliac Arteries with Autologous Venous Tissue, Open Approach                                                 |
| PAD | ICD10 | 041009D | Bypass Abdominal Aorta to Right External Iliac Artery with Autologous Venous Tissue, Open Approach                                                       |
| PAD | ICD10 | 041009F | Bypass Abdominal Aorta to Left External Iliac Artery with Autologous Venous Tissue, Open Approach                                                        |
| PAD | ICD10 | 041009G | Bypass Abdominal Aorta to Bilateral External Iliac Arteries with Autologous Venous Tissue, Open Approach                                                 |
| PAD | ICD10 | 041009H | Bypass Abdominal Aorta to Right Femoral Artery with Autologous Venous Tissue, Open Approach                                                              |
| PAD | ICD10 | 041009J | Bypass Abdominal Aorta to Left Femoral Artery with Autologous Venous Tissue, Open Approach                                                               |
| PAD | ICD10 | 041009K | Bypass Abdominal Aorta to Bilateral Femoral Arteries with Autologous Venous Tissue, Open Approach                                                        |
| PAD | ICD10 | 041009Q | Bypass Abdominal Aorta to Lower Extremity Artery with Autologous Venous Tissue, Open Approach                                                            |
| PAD | ICD10 | 041009R | Bypass Abdominal Aorta to Lower Artery with Autologous Venous Tissue, Open Approach                                                                      |
| PAD | ICD10 | 04100A6 | Bypass Abdominal Aorta to Right Common Iliac Artery with Autologous Arterial Tissue, Open Approach                                                       |
| PAD | ICD10 | 04100A7 | Bypass Abdominal Aorta to Left Common Iliac Artery with Autologous Arterial Tissue, Open Approach                                                        |
| PAD | ICD10 | 04100A8 | Bypass Abdominal Aorta to Bilateral Common Iliac Arteries with Autologous Arterial Tissue, Open Approach                                                 |
| PAD | ICD10 | 04100A9 | Bypass Abdominal Aorta to Right Internal Iliac Artery with Autologous Arterial Tissue, Open Approach                                                     |
| PAD | ICD10 | 04100AB | Bypass Abdominal Aorta to Left Internal Iliac Artery with Autologous Arterial Tissue, Open Approach                                                      |
| PAD | ICD10 | 04100AC | Bypass Abdominal Aorta to Bilateral Internal Iliac Arteries with Autologous Arterial Tissue, Open Approach                                               |
| PAD | ICD10 | 04100AD | Bypass Abdominal Aorta to Right External Iliac Artery with Autologous Arterial Tissue, Open Approach                                                     |
| PAD | ICD10 | 04100AF | Bypass Abdominal Aorta to Left External Iliac Artery with Autologous Arterial Tissue, Open Approach                                                      |
| PAD | ICD10 | 04100AG | Bypass Abdominal Aorta to Bilateral External Iliac Arteries with Autologous Arterial Tissue, Open Approach                                               |
| PAD | ICD10 | 04100AH | Bypass Abdominal Aorta to Right Femoral Artery with Autologous Arterial Tissue, Open Approach                                                            |
| PAD | ICD10 | 04100AJ | Bypass Abdominal Aorta to Left Femoral Artery with Autologous Arterial Tissue, Open Approach                                                             |
| PAD | ICD10 | 04100AK | Bypass Abdominal Aorta to Bilateral Femoral Arteries with Autologous Arterial Tissue, Open Approach                                                      |
| PAD | ICD10 | 04100AQ | Bypass Abdominal Aorta to Lower Extremity Artery with Autologous Arterial Tissue, Open Approach                                                          |
| PAD | ICD10 | 04100AR | Bypass Abdominal Aorta to Lower Artery with Autologous Arterial Tissue, Open Approach                                                                    |
| PAD | ICD10 | 04100J6 | Bypass Abdominal Aorta to Right Common Iliac Artery with Synthetic Substitute, Open Approach                                                             |
| PAD | ICD10 | 04100J7 | Bypass Abdominal Aorta to Left Common Iliac Artery with Synthetic Substitute, Open Approach                                                              |
| PAD | ICD10 | 04100J8 | Bypass Abdominal Aorta to Bilateral Common Iliac Arteries with Synthetic Substitute, Open Approach                                                       |
| PAD | ICD10 | 04100J9 | Bypass Abdominal Aorta to Right Internal Iliac Artery with Synthetic Substitute, Open Approach                                                           |
| PAD | ICD10 | 04100JB | Bypass Abdominal Aorta to Left Internal Iliac Artery with Synthetic Substitute, Open Approach                                                            |
| PAD | ICD10 | 04100JC | Bypass Abdominal Aorta to Bilateral Internal Iliac Arteries with Synthetic Substitute, Open Approach                                                     |
| PAD | ICD10 | 04100JD | Bypass Abdominal Aorta to Right External Iliac Artery with Synthetic Substitute, Open Approach                                                           |
| PAD | ICD10 | 04100JF | Bypass Abdominal Aorta to Left External Iliac Artery with Synthetic Substitute, Open Approach                                                            |
| PAD | ICD10 | 04100JG | Bypass Abdominal Aorta to Bilateral External Iliac Arteries with Synthetic Substitute, Open Approach                                                     |

























|     |       |         |                                                                                                                               |
|-----|-------|---------|-------------------------------------------------------------------------------------------------------------------------------|
| PAD | ICD10 | 041N4JM | Bypass Left Popliteal Artery to Peroneal Artery with Synthetic Substitute, Percutaneous Endoscopic Approach                   |
| PAD | ICD10 | 041N4JP | Bypass Left Popliteal Artery to Foot Artery with Synthetic Substitute, Percutaneous Endoscopic Approach                       |
| PAD | ICD10 | 041N4JQ | Bypass Left Popliteal Artery to Lower Extremity Artery with Synthetic Substitute, Percutaneous Endoscopic Approach            |
| PAD | ICD10 | 041N4JS | Bypass Left Popliteal Artery to Lower Extremity Vein with Synthetic Substitute, Percutaneous Endoscopic Approach              |
| PAD | ICD10 | 041N4KL | Bypass Left Popliteal Artery to Popliteal Artery with Nonautologous Tissue Substitute, Percutaneous Endoscopic Approach       |
| PAD | ICD10 | 041N4KM | Bypass Left Popliteal Artery to Peroneal Artery with Nonautologous Tissue Substitute, Percutaneous Endoscopic Approach        |
| PAD | ICD10 | 041N4KP | Bypass Left Popliteal Artery to Foot Artery with Nonautologous Tissue Substitute, Percutaneous Endoscopic Approach            |
| PAD | ICD10 | 041N4KQ | Bypass Left Popliteal Artery to Lower Extremity Artery with Nonautologous Tissue Substitute, Percutaneous Endoscopic Approach |
| PAD | ICD10 | 041N4KS | Bypass Left Popliteal Artery to Lower Extremity Vein with Nonautologous Tissue Substitute, Percutaneous Endoscopic Approach   |
| PAD | ICD10 | 041N4ZL | Bypass Left Popliteal Artery to Popliteal Artery, Percutaneous Endoscopic Approach                                            |
| PAD | ICD10 | 041N4ZM | Bypass Left Popliteal Artery to Peroneal Artery, Percutaneous Endoscopic Approach                                             |
| PAD | ICD10 | 041N4ZP | Bypass Left Popliteal Artery to Foot Artery, Percutaneous Endoscopic Approach                                                 |
| PAD | ICD10 | 041N4ZQ | Bypass Left Popliteal Artery to Lower Extremity Artery, Percutaneous Endoscopic Approach                                      |
| PAD | ICD10 | 041N4ZS | Bypass Left Popliteal Artery to Lower Extremity Vein, Percutaneous Endoscopic Approach                                        |
| PAD | ICD10 | 0470*** | Dilation of Aotra                                                                                                             |
| PAD | ICD10 | 047C*** | Dilation of Common Iliac Artery, Right                                                                                        |
| PAD | ICD10 | 047D*** | Dilation of Common Iliac Artery, Left                                                                                         |
| PAD | ICD10 | 047E*** | Dilation of Internal Iliac Artery, Right                                                                                      |
| PAD | ICD10 | 047F*** | Dilation of Internal Iliac Artery, Left                                                                                       |
| PAD | ICD10 | 047H*** | Dilation of External Iliac Artery, Right                                                                                      |
| PAD | ICD10 | 047J*** | Dilation of External Iliac Artery, Left                                                                                       |
| PAD | ICD10 | 047K*** | Dilation of Femoral Artery, Right                                                                                             |
| PAD | ICD10 | 047L*** | Dilation of Femoral Artery, Left                                                                                              |
| PAD | ICD10 | 047M*** | Dilation of Popliteal Artery, Right                                                                                           |
| PAD | ICD10 | 047N*** | Dilation of Popliteal Artery, Left                                                                                            |
| PAD | ICD10 | 047P*** | Dilation of Anterior Tibial Artery, Right                                                                                     |
| PAD | ICD10 | 047Q*** | Dilation of Anterior Tibial Artery, Left                                                                                      |
| PAD | ICD10 | 047R*** | Dilation of Posterior Tibial Artery, Right                                                                                    |
| PAD | ICD10 | 047S*** | Dilation of Posterior Tibial Artery, Left                                                                                     |
| PAD | ICD10 | 047T*** | Dilation of Perneal Artery, Right                                                                                             |
| PAD | ICD10 | 047U*** | Dilation of Peroneal Artery, Left                                                                                             |
| PAD | ICD10 | 047V*** | Dilation of Foot Artery, Right                                                                                                |
| PAD | ICD10 | 047W*** | Dilation of Foot Artery, Left                                                                                                 |
| PAD | ICD10 | 047Y*** | Dilation of Lower Artery                                                                                                      |
| PAD | ICD10 | 04C0*** | Extirpation of Aotra                                                                                                          |
| PAD | ICD10 | 04CC*** | Extirpation of Common Iliac Artery, Right                                                                                     |
| PAD | ICD10 | 04CD*** | Extirpation of Common Iliac Artery, Left                                                                                      |
| PAD | ICD10 | 04CE*** | Extirpation of Internal Iliac Artery, Right                                                                                   |
| PAD | ICD10 | 04CF*** | Extirpation of Internal Iliac Artery, Left                                                                                    |
| PAD | ICD10 | 04CH*** | Extirpation of External Iliac Artery, Right                                                                                   |
| PAD | ICD10 | 04CJ*** | Extirpation of External Iliac Artery, Left                                                                                    |
| PAD | ICD10 | 04CK*** | Extirpation of Femoral Artery, Right                                                                                          |
| PAD | ICD10 | 04CL*** | Extirpation of Femoral Artery, Left                                                                                           |
| PAD | ICD10 | 04CM*** | Extirpation of Popliteal Artery, Right                                                                                        |
| PAD | ICD10 | 04CN*** | Extirpation of Popliteal Artery, Left                                                                                         |
| PAD | ICD10 | 04CP*** | Extirpation of Anterior Tibial Artery, Right                                                                                  |
| PAD | ICD10 | 04CQ*** | Extirpation of Anterior Tibial Artery, Left                                                                                   |
| PAD | ICD10 | 04CR*** | Extirpation of Posterior Tibial Artery, Right                                                                                 |
| PAD | ICD10 | 04CS*** | Extirpation of Posterior Tibial Artery, Left                                                                                  |
| PAD | ICD10 | 04CT*** | Extirpation of Perneal Artery, Right                                                                                          |
| PAD | ICD10 | 04CU*** | Extirpation of Peroneal Artery, Left                                                                                          |
| PAD | ICD10 | 04CV*** | Extirpation of Foot Artery, Right                                                                                             |
| PAD | ICD10 | 04CW*** | Extirpation of Foot Artery, Left                                                                                              |
| PAD | ICD10 | 04CY*** | Extirpation of Lower Artery                                                                                                   |
| PAD | ICD10 | 0Y62*** | Detachment at Right Hindquarter, Open Approach                                                                                |
| PAD | ICD10 | 0Y63*** | Detachment at Left Hindquarter, Open Approach                                                                                 |
| PAD | ICD10 | 0Y64*** | Detachment at Bilateral Hindquarters, Open Approach                                                                           |
| PAD | ICD10 | 0Y67*** | Detachment at Right Femoral Region, Open Approach                                                                             |
| PAD | ICD10 | 0Y68*** | Detachment at Left Femoral Region, Open Approach                                                                              |
| PAD | ICD10 | 0Y6C*** | Detachment at Right Upper Leg, Open Approach                                                                                  |
| PAD | ICD10 | 0Y6D*** | Detachment at Left Upper Leg, Open Approach                                                                                   |
| PAD | ICD10 | 0Y6F*** | Detachment at Right Knee Region, Open Approach                                                                                |
| PAD | ICD10 | 0Y6G*** | Detachment at Left Knee Region, Open Approach                                                                                 |



|     |       |         |                                                                                           |
|-----|-------|---------|-------------------------------------------------------------------------------------------|
| PAD | ICD10 | 0Y6H*** | Detachment at Right Lower Leg, Open Approach                                              |
| PAD | ICD10 | 0Y6J*** | Detachment at Left Lower Leg, Open Approach                                               |
| PAD | ICD10 | 0Y6M*** | Detachment at Right Foot, Open Approach                                                   |
| PAD | ICD10 | 0Y6N*** | Detachment at Left Foot, Open Approach                                                    |
| PAD | ICD9  | 440     | Atherosclerosis of the aorta                                                              |
| PAD | ICD9  | 440.2   | Atherosclerosis of the native arteries of the extremities, unspecified                    |
| PAD | ICD9  | 440.21  | Atherosclerosis of the native arteries of the extremities, with intermittent claudication |
| PAD | ICD9  | 440.22  | Atherosclerosis of the native arteries of the extremities, with rest pain                 |
| PAD | ICD9  | 440.23  | Atherosclerosis of native arteries of the extremities with ulceration                     |
| PAD | ICD9  | 440.24  | Atherosclerosis of the native arteries of the extremities, with gangrene                  |
| PAD | ICD9  | 440.29  | Atherosclerosis of the native arteries of the extremities, other                          |
| PAD | ICD9  | 440.3   | Atherosclerosis of bypass graft of the extremities, unspecified                           |
| PAD | ICD9  | 440.31  | Atherosclerosis of bypass graft of the extremities, autogenous vein                       |
| PAD | ICD9  | 440.32  | Atherosclerosis of bypass graft of the extremities, non-autogenous vein                   |
| PAD | ICD9  | 440.4   | Chronic total occlusion of the artery of the extremities                                  |
| PAD | ICD9  | 440.8   | Atherosclerosis of other specified arteries                                               |
| PAD | ICD9  | 443.9   | Peripheral vascular disease, unspecified                                                  |
| PAD | ICD9  | 38.14   | Endarterectomy, Aorta                                                                     |
| PAD | ICD9  | 38.18   | Endarterectomy, Lower limb arteries                                                       |
| PAD | ICD9  | 39.25   | Aorto-iliac-femoral bypass                                                                |
| PAD | ICD9  | 39.29   | Peripheral vascular bypass                                                                |
| PAD | ICD9  | 39.5    | Angioplasty or atherectomy of non-coronary vessels                                        |
| PAD | ICD9  | 39.9    | Insertion of non-drug-eluting peripheral vessel stents                                    |
| PAD | ICD9  | 84.1    | Amputation of the lower limb, not otherwise specified                                     |
| PAD | ICD9  | 84.12   | Amputation through foot                                                                   |
| PAD | ICD9  | 84.13   | Disarticulation of ankle                                                                  |
| PAD | ICD9  | 84.14   | Amputation through ankle                                                                  |
| PAD | ICD9  | 84.15   | Other amputation below knee                                                               |
| PAD | ICD9  | 84.16   | Disarticulation of knee                                                                   |
| PAD | ICD9  | 84.17   | Amputation above knee                                                                     |
| PAD | ICD9  | 84.18   | Disarticulation of hip                                                                    |
| PAD | ICD9  | 84.19   | Abdominopelvic amputation                                                                 |
| PAD | ICD9  | 84.3    | Revision of amputation stump                                                              |

**Supplemental Table 3. Proportion of individuals with missing data for baseline variables with missingness and the variance inflation factor for these variables due to imputation**

| <b>Variable</b> | <b>Proportion of participants with missing data at baseline</b> | <b>Variance Inflation Factor</b> |
|-----------------|-----------------------------------------------------------------|----------------------------------|
| Systolic BP     | 0.06                                                            | 1.06                             |
| Diastolic BP    | 0.18                                                            | 1.23                             |
| Body mass index | 0.09                                                            | 1.10                             |
| LDL-C           | 0.24                                                            | 1.32                             |
| HDL-C           | 0.23                                                            | 1.29                             |
| Triglyceride-C  | 0.25                                                            | 1.34                             |
| eGFR            | 0.13                                                            | 1.15                             |

BP, blood pressure; LDL-C, low-density lipoprotein cholesterol; HDL-C, high-density lipoprotein cholesterol; Triglyceride-C, Triglyceride cholesterol eGFR, estimated Glomerular Filtration Rate

**Supplemental Table 4. Association of *APOL1* genotype and Incident CAD, Stroke and PAD**

|                                            | CAD   |        |                   |       | Stroke |        |                   |        | PAD   |        |                   |       |
|--------------------------------------------|-------|--------|-------------------|-------|--------|--------|-------------------|--------|-------|--------|-------------------|-------|
|                                            | N     | events | HR (95% CI)       | P     | N      | events | HR (95% CI)       | P      | N     | events | HR (95% CI)       | P     |
| <b>Number of <i>APOL1</i> risk alleles</b> |       |        |                   |       |        |        |                   |        |       |        |                   |       |
| 2 Risk alleles                             | 3254  | 539    | 1.11 (1.01, 1.21) | 0.039 | 3542   | 289    | 1.2 (1.05, 1.36)  | 0.007  | 3525  | 307    | 1.15 (1.01, 1.29) | 0.031 |
| 1 Risk Allele                              | 12396 | 2027   | 1.04 (0.97, 1.1)  | 0.25  | 13514  | 1015   | 1.03 (0.94, 1.12) | 0.476  | 13407 | 1107   | 1.02 (0.93, 1.1)  | 0.684 |
| 0 Risk alleles                             | 10836 | 1707   | Ref               | -     | 11732  | 857    | Ref               | -      | 11677 | 943    | Ref               | -     |
| <b><i>APOL1</i> genotype composition</b>   |       |        |                   |       |        |        |                   |        |       |        |                   |       |
| G1/G1                                      | 1145  | 194    | 1.13 (0.97, 1.29) | 0.11  | 1252   | 120    | 1.42 (1.17, 1.67) | 0.0003 | 1246  | 111    | 1.18 (0.97, 1.39) | 0.1   |
| G2/G2                                      | 519   | 72     | 0.89 (0.7, 1.08)  | 0.33  | 564    | 46     | 1.19 (0.89, 1.5)  | 0.25   | 553   | 43     | 1.02 (0.75, 1.29) | 0.88  |
| G1/G2                                      | 1590  | 273    | 1.16 (1.02, 1.3)  | 0.02  | 1726   | 123    | 1.03 (0.86, 1.2)  | 0.69   | 1726  | 153    | 1.17 (0.98, 1.35) | 0.09  |
| G1/Ref                                     | 7712  | 1251   | 1.03 (0.96, 1.11) | 0.36  | 8378   | 634    | 1.04 (0.94, 1.14) | 0.43   | 8314  | 653    | 0.98 (0.88, 1.07) | 0.65  |
| G2/Ref                                     | 4684  | 776    | 1.05 (0.96, 1.13) | 0.31  | 5136   | 381    | 1.02 (0.9, 1.13)  | 0.8    | 5093  | 454    | 1.1 (0.99, 1.22)  | 0.09  |
| Ref/Ref                                    | 10836 | 1707   | Ref               | -     | 11732  | 857    | Ref               | -      | 11677 | 943    | Ref               | -     |

P for fully adjusted cox proportional model with analysis covariates age, gender, LDL, diabetes, smoking, systolic blood pressure.

**Supplemental Table 5. Progressive covariate adjustment for association of *APOL1* genotype and incident CAD in individuals without kidney disease at baseline and censoring for CKD/ESRD in the follow up period**

|                |       | Covariates    |                   | Basic Model |                   | CAD risk adjusted model |                   | Fully adjusted model |  |
|----------------|-------|---------------|-------------------|-------------|-------------------|-------------------------|-------------------|----------------------|--|
|                |       |               |                   | +           |                   | +                       |                   | +                    |  |
|                |       | Age/sex / PCs |                   | +           |                   | +                       |                   | +                    |  |
|                |       | CAD *         |                   | +           |                   | +                       |                   | +                    |  |
|                |       | eGFR          |                   | +           |                   | +                       |                   | +                    |  |
|                | N     | events        | HR (95% CI)       | P           | HR (95% CI)       | P                       | HR (95% CI)       | P                    |  |
| 2 Risk alleles | 3254  | 539           | 1.1 (1, 1.2)      | 0.06        | 1.11 (1.01, 1.21) | 0.04                    | 1.11 (1.01, 1.21) | 0.04                 |  |
| 1 Risk Allele  | 12396 | 2027          | 1.04 (0.98, 1.11) | 0.51        | 1.03 (0.97, 1.1)  | 0.37                    | 1.04 (0.97, 1.1)  | 0.25                 |  |
| 0 Risk alleles | 10836 | 1707          | Ref               | -           | Ref               | -                       | Ref               | -                    |  |

\* CAD covariates: diabetes, SBP, DBP, BMI, LDL, HDL, TG, statin, anti-hypertensive medication, aspirin, tobacco use

**Supplemental Table 6. Progressive covariate adjustment for association of *APOL1* genotype and incident PAD in individuals without kidney disease at baseline and censoring for CKD/ESRD in the follow up period**

|                |       | Covariates    |                   | Basic Model |                   | PAD risk adjusted model |                   | PAD & kidney risk adjusted model |  |
|----------------|-------|---------------|-------------------|-------------|-------------------|-------------------------|-------------------|----------------------------------|--|
|                |       |               |                   | +           |                   | +                       |                   | +                                |  |
|                |       | Age/sex / PCs |                   | +           |                   | +                       |                   | +                                |  |
|                |       | PAD *         |                   | +           |                   | +                       |                   | +                                |  |
|                |       | eGFR          |                   | +           |                   | +                       |                   | +                                |  |
|                | N     | events        | HR (95% CI)       | P           | HR (95% CI)       | P                       | HR (95% CI)       | P                                |  |
| 2 Risk alleles | 3525  | 307           | 1.13 (0.99, 1.28) | 0.07        | 1.15 (1.01, 1.29) | 0.03                    | 1.17 (1.01, 1.32) | 0.04                             |  |
| 1 Risk Allele  | 13407 | 1107          | 1.03 (0.94, 1.12) | 0.54        | 1.02 (0.93, 1.1)  | 0.68                    | 1.03 (0.94, 1.12) | 0.63                             |  |
| 0 Risk alleles | 11677 | 943           | Ref               | -           | Ref               | -                       | Ref               | -                                |  |

\* PAD covariates: diabetes, SBP, DBP, BMI, LDL, HDL, TG, statin, anti-hypertensive medication, aspirin, tobacco use

**Supplemental Table 7. Progressive covariate adjustment for association of *APOL1* genotype and incident Stroke in individuals without kidney disease at baseline and censoring for CKD/ESRD in the follow up period**

|                | Covariates<br>Age/sex / PCs<br>Stroke *<br>eGFR |        | Basic Model       |      | Stroke risk adjusted model |      | Stroke & kidney risk adjusted model |      |
|----------------|-------------------------------------------------|--------|-------------------|------|----------------------------|------|-------------------------------------|------|
|                |                                                 |        | +                 |      | +                          |      | +                                   |      |
|                |                                                 |        |                   |      | +                          |      | +                                   |      |
|                |                                                 |        |                   |      |                            |      | +                                   |      |
|                | N                                               | events | HR (95% CI)       | P    | HR (95% CI)                | P    | HR (95% CI)                         | P    |
| 2 Risk alleles | 3542                                            | 289    | 1.19 (1.03, 1.35) | 0.01 | 1.2 (1.05, 1.36)           | 0.01 | 1.21 (1.05, 1.37)                   | 0.01 |
| 1 Risk Allele  | 13514                                           | 1015   | 1.04 (0.95, 1.14) | 0.41 | 1.03 (0.94, 1.12)          | 0.48 | 1.04 (0.94, 1.13)                   | 0.52 |
| 0 Risk alleles | 11732                                           | 857    | Ref               | -    | Ref                        | -    | Ref                                 | -    |

\* Stroke covariates: diabetes, SBP, DBP, BMI, LDL, HDL, TG, statin, anti-hypertensive medication, aspirin, tobacco use

**Supplemental Table 8. Progressive covariate adjustment for association of *APOL1* genotype and incident CAD in all individuals irrespective of kidney disease status**

| Covariates<br>Age/sex / PCs<br>CAD covariates*<br>eGFR<br>Incident CKD in follow up<br><b>APOL1</b> | Basic Model      |       | CAD risk adjusted imputed model |       | CAD and eGFR risk adjusted imputed model |      | CAD, eGFR and CKD risk adjusted imputed model |      |
|-----------------------------------------------------------------------------------------------------|------------------|-------|---------------------------------|-------|------------------------------------------|------|-----------------------------------------------|------|
|                                                                                                     | +                |       | +                               |       | +                                        |      | +                                             |      |
|                                                                                                     |                  |       | +                               |       | +                                        |      | +                                             |      |
|                                                                                                     |                  |       |                                 |       |                                          |      | +                                             |      |
|                                                                                                     | HR (95% CI)      | P     | HR (95% CI)                     | P     | HR (95% CI)                              | P    | HR (95% CI)                                   | P    |
| 2 Risk alleles                                                                                      | 1.09 (1, 1.19)   | 0.058 | 1.09 (0.99, 1.19)               | 0.064 | 1.06 (0.97, 1.16)                        | 0.18 | 1.07 (0.98, 1.17)                             | 0.15 |
| 1 Risk Allele                                                                                       | 1.04 (0.98, 1.1) | 0.20  | 1.03 (0.97, 1.1)                | 0.30  | 1.03 (0.97, 1.09)                        | 0.33 | 1.03 (0.97, 1.09)                             | 0.36 |
| 0 Risk alleles                                                                                      | Ref              | -     | Ref                             | -     | Ref                                      | -    | Ref                                           | -    |

\* CAD covariates: diabetes, SBP, DBP, BMI, LDL, HDL, TG, statin, anti-hypertensive medication, aspirin, tobacco use

**Supplemental Table 9. Progressive covariate adjustment for association of *APOL1* genotype and incident PAD in all individuals irrespective of kidney disease status**

| Covariates                | Basic Model        |          | PAD risk adjusted imputed model |          | PAD, eGFR and CKD risk adjusted imputed model |          |
|---------------------------|--------------------|----------|---------------------------------|----------|-----------------------------------------------|----------|
|                           |                    |          |                                 |          |                                               |          |
| Age/sex / PCs             | +                  |          | +                               |          | +                                             |          |
| PAD covariates*           |                    |          | +                               |          | +                                             |          |
| eGFR                      |                    |          |                                 |          | +                                             |          |
| Incident CKD in follow up |                    |          |                                 |          | +                                             |          |
| <b>APOL1</b>              | <b>HR (95% CI)</b> | <b>P</b> | <b>HR (95% CI)</b>              | <b>P</b> | <b>HR (95% CI)</b>                            | <b>P</b> |
| 2 Risk alleles            | 1.16 (1.02, 1.3)   | 0.02     | 1.17 (1.03, 1.31)               | 0.02     | 1.02 (0.93, 1.1)                              | 0.07     |
| 1 Risk Allele             | 1.03 (0.95, 1.12)  | 0.49     | 1.02 (0.94, 1.11)               | 0.63     | 1.13 (0.99, 1.26)                             | 0.71     |
| 0 Risk alleles            | Ref                | -        | Ref                             | -        | Ref                                           | -        |

\* PAD covariates: diabetes, SBP, DBP, BMI, LDL, HDL, TG, statin, anti-hypertensive medication, aspirin, tobacco use

**Supplemental Table 10. Progressive covariate adjustment for association of *APOL1* genotype and incident Stroke in all individuals irrespective of kidney disease status**

| Covariates                | Basic Model        |          | Stroke risk adjusted imputed model |          | Stroke, eGFR and CKD risk adjusted imputed model |          |
|---------------------------|--------------------|----------|------------------------------------|----------|--------------------------------------------------|----------|
|                           |                    |          |                                    |          |                                                  |          |
| Age/sex / PCs             | +                  |          | +                                  |          | +                                                |          |
| Stroke covariates*        |                    |          | +                                  |          | +                                                |          |
| eGFR                      |                    |          |                                    |          | +                                                |          |
| Incident CKD in follow up |                    |          |                                    |          | +                                                |          |
| <b>APOL1</b>              | <b>HR (95% CI)</b> | <b>P</b> | <b>HR (95% CI)</b>                 | <b>P</b> | <b>HR (95% CI)</b>                               | <b>P</b> |
| 2 Risk alleles            | 1.16 (1.01, 1.30)  | 0.04     | 1.16 (1.01, 1.31)                  | 0.04     | 1.17 (1.02, 1.32)                                | 0.03     |
| 1 Risk Allele             | 1.03 (0.94, 1.12)  | 0.52     | 1.03 (0.94, 1.12)                  | 0.63     | 1.03 (0.93, 1.12)                                | 0.64     |
| 0 Risk alleles            | Ref                | -        | Ref                                | -        | Ref                                              | -        |

\* Stroke covariates: diabetes, SBP, DBP, BMI, LDL, HDL, TG, statin, anti-hypertensive medication, aspirin, tobacco use

**Supplemental Table 11. Competing Risks Analysis of APOL1 association with CAD, PAD and Stroke**

|                                                       | Minimally adjusted Fine-Grey SDH analysis* |      | Fully adjusted Fine-Grey SDH analysis** |      |
|-------------------------------------------------------|--------------------------------------------|------|-----------------------------------------|------|
|                                                       | HR                                         | P    | HR                                      | P    |
| <b>CAD</b>                                            |                                            |      |                                         |      |
| <b>Fine-Grey SDH</b>                                  |                                            |      |                                         |      |
| CAD                                                   | 1.02 (0.97, 1.08)                          | 0.41 | 1.05 (0.97, 1.14)                       | 0.19 |
| <b>Cause specific Cox</b>                             |                                            |      |                                         |      |
| Main outcome: CAD                                     | 1.02 (0.97, 1.08)                          | 0.40 | 1.05 (0.97, 1.14)                       | 0.48 |
| Main outcome and competing event (CAD or CKD/ESRD)    | 1.04 (1.01, 1.07)                          | 0.01 | 1.05 (1, 1.09)                          | 0.03 |
| <b>PAD</b>                                            |                                            |      |                                         |      |
| <b>Fine-Grey SDH</b>                                  |                                            |      |                                         |      |
| PAD                                                   | 0.99 (0.92, 1.06)                          | 0.76 | 0.99 (0.88, 1.11)                       | 0.89 |
| <b>Cause specific Cox</b>                             |                                            |      |                                         |      |
| Main outcome: PAD                                     | 0.99 (0.91, 1.07)                          | 0.86 | 1.01 (0.90, 1.13)                       | 0.90 |
| Main outcome and competing event (PAD or CKD/ESRD)    | 1.04 (1.01, 1.07)                          | 0.01 | 1.03 (0.99, 1.08)                       | 0.10 |
| <b>Stroke</b>                                         |                                            |      |                                         |      |
| <b>Fine-Grey SDH</b>                                  |                                            |      |                                         |      |
| Stroke                                                | 1.03 (0.95, 1.11)                          | 0.53 | 1.01 (0.90, 1.13)                       | 0.83 |
| <b>Cause specific Cox</b>                             |                                            |      |                                         |      |
| Main outcome: Stroke                                  | 0.99 (0.92, 1.07)                          | 0.86 | 0.99 (0.89, 1.11)                       | 0.89 |
| Main outcome and competing event (Stroke or CKD/ESRD) | 1.04 (1.01, 1.07)                          | 0.01 | 1.03 (0.99, 1.08)                       | 0.10 |

\* covariates age, sex, PC1-5; \*\* covariates: age, sex, PC1-5, diabetes, SBP, DBP, BMI, LDL, HDL, TG, statin, anti-hypertensive medication, aspirin, tobacco use, eGFR

**Supplemental Table 12. Association of APOL1 genotype and Incident CAD stratified by Sex**

| APOL1          | Male  |        |                   |       | Female |        |                   |      |
|----------------|-------|--------|-------------------|-------|--------|--------|-------------------|------|
|                | N     | events | HR (95% CI)       | P     | N      | events | HR (95% CI)       | P    |
| 2 Risk alleles | 2818  | 506    | 1.11 (1, 1.21)    | 0.051 | 436    | 33     | 1.09 (0.73, 1.45) | 0.67 |
| 1 Risk Allele  | 10857 | 1931   | 1.05 (0.98, 1.12) | 0.16  | 1539   | 96     | 0.9 (0.68, 1.13)  | 0.48 |
| 0 Risk alleles | 9489  | 1614   | Ref               | -     | 1347   | 93     | Ref               | -    |

**Supplemental Table 13. Association of *APOL1* genotype and Incident CAD stratified by baseline diabetes status**

| <i>APOL1</i>   | No Diabetes |        |                   |      | Diabetes |        |                   |      |
|----------------|-------------|--------|-------------------|------|----------|--------|-------------------|------|
|                | N           | events | HR (95% CI)       | P    | N        | events | HR (95% CI)       | P    |
| 2 Risk alleles | 2558        | 352    | 1.06 (0.94, 1.18) | 0.34 | 696      | 187    | 1.19 (1, 1.37)    | 0.05 |
| 1 Risk Allele  | 9688        | 1354   | 1.03 (0.95, 1.11) | 0.43 | 2708     | 673    | 1.06 (0.94, 1.17) | 0.34 |
| 0 Risk alleles | 8546        | 1167   | Ref               | -    | 2290     | 540    | Ref               | -    |

**Supplemental Table 14. Association of *APOL1* risk alleles with prevalent lipid traits**

|                                            | Log2[HDL-C] (mg/dL)  |       | Log2[LDL-C] (mg/dL)  |       | Log2[Triglycerides] (mg/dL) |      |
|--------------------------------------------|----------------------|-------|----------------------|-------|-----------------------------|------|
|                                            | Beta (95% CI)        | P     | Beta (95% CI)        | P     | Beta (95% CI)               | P    |
| <b>Number of <i>APOL1</i> risk alleles</b> |                      |       |                      |       |                             |      |
| 2 Risk alleles                             | 0.021 (0.005, 0.038) | 0.012 | 0.020 (0.005, 0.035) | 0.008 | 0.01 (-0.01, 0.03)          | 0.56 |
| 1 Risk Allele                              | 0.01 (-0.01, 0.02)   | 0.31  | 0 (0, 0.01)          | 0.6   | 0.0 (-0.02, 0.04)           | 0.54 |
| 0 Risk alleles                             | Ref                  | -     | Ref                  | -     | Ref                         | -    |
| <b><i>APOL1</i> genotype composition</b>   |                      |       |                      |       |                             |      |
| G1/G1                                      | 0.02 (0.00, 0.05)    | 0.11  | 0.03 (0.01, 0.05)    | 0.02  | 0.01 (-0.04, 0.06)          | 0.64 |
| G2/G2                                      | 0.03 (0.01, 0.09)    | 0.009 | -0.01 (-0.04, 0.03)  | 0.10  | -0.02 (-0.08, 0.05)         | 0.67 |
| G1/G2                                      | 0.02 (-0.01, 0.04)   | 0.17  | 0.02 (0.003, 0.04)   | 0.03  | 0.01 (-0.03, 0.04)          | 0.72 |
| G1/Ref                                     | 0.01 (0, 0.02)       | 0.14  | 0 (-0.01, 0.01)      | 0.84  | 0.00 (-0.02, 0.03)          | 0.88 |
| G2/Ref                                     | 0.01 (-0.01, 0.02)   | 0.97  | 0.01 (-0.01, 0.02)   | 0.21  | 0.01 (-0.02, 0.04)          | 0.38 |
| 0 risk alleles                             | Ref                  | -     | Ref                  | -     | Ref                         | -    |

Analysis covariates include age, gender, diabetes, smoking, and chronic kidney disease. HDL-C, high-density lipoprotein cholesterol. LDL-C, low-density lipoprotein cholesterol.

**Supplemental Table 15. Nominally significant cardiovascular phenome wide association of *APOL1* 2-risk allele status adjusted for age, gender, baseline eGFR and ancestry principal components**

| PheWAS pcode | Phenotype Description            | N Cases | OR   | p    |
|--------------|----------------------------------|---------|------|------|
| 444          | Arterial embolism and thrombosis | 47      | 2.27 | 0.02 |
| 396          | Abnormal heart sounds            | 405     | 0.70 | 0.05 |
| 451          | Phlebitis and thrombophlebitis   | 178     | 0.53 | 0.04 |
| 454          | Varicose Veins                   | 537     | 0.72 | 0.04 |



**Supplemental Table 16. Phenome wide association of APOL1 2-risk allele status on CVD phenotypes**

| <b>phecode</b> | <b>Phenotype Description</b>                      | <b>N Cases</b> | <b>OR</b> | <b>P</b> |
|----------------|---------------------------------------------------|----------------|-----------|----------|
| 394            | Rheumatic disease of the heart valves             | 126            | 1.26      | 0.37     |
| 395            | Heart valve disorders                             | 516            | 0.97      | 0.82     |
| 395.1          | Nonrheumatic mitral valve disorders               | 242            | 1.00      | 0.99     |
| 395.2          | Nonrheumatic aortic valve disorders               | 181            | 0.85      | 0.52     |
| 395.6          | Heart valve replaced                              | 63             | 0.79      | 0.58     |
| 396            | Abnormal heart sounds                             | 405            | 0.70      | 0.05     |
| 401            | Hypertension                                      | 12265          | 1.00      | 0.97     |
| 401.1          | Essential hypertension                            | 12247          | 1.00      | 0.98     |
| 401.2          | Hypertensive heart and/or renal disease           | 754            | 0.84      | 0.22     |
| 401.21         | Hypertensive heart disease                        | 564            | 0.82      | 0.22     |
| 401.22         | Hypertensive chronic kidney disease               | 147            | 0.85      | 0.57     |
| 401.3          | Other hypertensive complications                  | 111            | 0.94      | 0.83     |
| 411            | Ischemic Heart Disease                            | 2980           | 0.95      | 0.45     |
| 411.1          | Unstable angina (intermediate coronary syndrome)  | 307            | 0.70      | 0.10     |
| 411.2          | Myocardial infarction                             | 611            | 1.01      | 0.96     |
| 411.3          | Angina pectoris                                   | 638            | 0.98      | 0.86     |
| 411.4          | Coronary atherosclerosis                          | 2146           | 0.95      | 0.51     |
| 411.8          | Other chronic ischemic heart disease, unspecified | 1306           | 0.99      | 0.88     |
| 414            | Other forms of chronic heart disease              | 456            | 1.19      | 0.22     |
| 414.2          | ASCVD                                             | 46             | 1.76      | 0.15     |
| 415            | Pulmonary heart disease                           | 505            | 0.74      | 0.06     |
| 415.1          | Acute pulmonary heart disease                     | 317            | 0.77      | 0.20     |
| 415.11         | Pulmonary embolism and infarction, acute          | 317            | 0.77      | 0.20     |
| 415.2          | Chronic pulmonary heart disease                   | 187            | 0.64      | 0.11     |
| 415.21         | Primary pulmonary hypertension                    | 51             | 0.88      | 0.80     |
| 416            | Cardiomegaly                                      | 272            | 0.82      | 0.35     |
| 418            | Nonspecific chest pain                            | 5852           | 1.03      | 0.61     |
| 418.1          | Precordial pain                                   | 46             | 0.72      | 0.54     |
| 420            | Carditis                                          | 196            | 1.05      | 0.84     |
| 420.2          | Pericarditis                                      | 120            | 1.14      | 0.63     |
| 420.3          | Endocarditis                                      | 69             | 0.98      | 0.97     |
| 425            | Cardiomyopathy                                    | 512            | 0.83      | 0.22     |
| 425.1          | Primary/intrinsic cardiomyopathies                | 473            | 0.80      | 0.18     |
| 425.2          | Secondary/extrinsic cardiomyopathies              | 78             | 0.65      | 0.31     |
| 426            | Cardiac conduction disorders                      | 1622           | 1.05      | 0.54     |
| 426.2          | Atrioventricular [AV] block                       | 227            | 1.16      | 0.48     |
| 426.21         | First degree AV block                             | 97             | 1.53      | 0.13     |
| 426.24         | Atrioventricular block, complete                  | 79             | 1.42      | 0.27     |
| 426.3          | Bundle branch block                               | 144            | 1.30      | 0.30     |
| 426.31         | Right bundle branch block                         | 82             | 1.65      | 0.11     |

|        |                                                                    |      |      |      |
|--------|--------------------------------------------------------------------|------|------|------|
| 426.32 | Left bundle branch block                                           | 46   | 0.78 | 0.64 |
| 426.7  | Abnormal electrocardiogram [ECG] [EKG]                             | 1060 | 1.05 | 0.62 |
| 426.9  | Cardiac pacemaker/device in situ                                   | 285  | 1.00 | 0.99 |
| 426.91 | Cardiac pacemaker in situ                                          | 157  | 1.04 | 0.89 |
| 426.92 | Cardiac defibrillator in situ                                      | 174  | 0.96 | 0.87 |
| 427    | Cardiac dysrhythmias                                               | 3619 | 0.98 | 0.81 |
| 427.1  | Paroxysmal tachycardia, unspecified                                | 283  | 0.91 | 0.63 |
| 427.11 | Paroxysmal supraventricular tachycardia                            | 138  | 0.94 | 0.83 |
| 427.12 | Paroxysmal ventricular tachycardia                                 | 137  | 0.93 | 0.80 |
| 427.2  | Atrial fibrillation and flutter                                    | 699  | 0.94 | 0.65 |
| 427.21 | Atrial fibrillation                                                | 632  | 1.00 | 0.98 |
| 427.22 | Atrial flutter                                                     | 218  | 0.74 | 0.24 |
| 427.3  | Other specified cardiac dysrhythmias                               | 986  | 1.03 | 0.81 |
| 427.4  | Cardiac arrest and ventricular fibrillation                        | 40   | 0.73 | 0.60 |
| 427.5  | Arrhythmia (cardiac) NOS                                           | 1054 | 0.97 | 0.76 |
| 427.6  | Premature beats                                                    | 176  | 1.34 | 0.18 |
| 427.7  | Tachycardia NOS                                                    | 442  | 1.01 | 0.92 |
| 427.8  | Sinoatrial node dysfunction (Bradycardia)                          | 50   | 1.09 | 0.84 |
| 427.9  | Palpitations                                                       | 709  | 1.01 | 0.97 |
| 428    | Congestive heart failure; nonhypertensive                          | 1074 | 0.82 | 0.07 |
| 428.1  | Congestive heart failure (CHF) NOS                                 | 769  | 0.89 | 0.35 |
| 428.2  | Heart failure NOS                                                  | 242  | 0.74 | 0.20 |
| 428.3  | Heart failure with reduced EF [Systolic or combined heart failure] | 409  | 0.87 | 0.41 |
| 428.4  | Heart failure with preserved EF [Diastolic heart failure]          | 215  | 0.66 | 0.10 |
| 429    | Ill-defined descriptions and complications of heart disease        | 251  | 1.01 | 0.96 |
| 429.1  | Heart transplant/surgery                                           | 42   | 0.62 | 0.42 |
| 429.2  | Abnormal function study of cardiovascular system                   | 116  | 0.92 | 0.79 |
| 429.3  | Symptoms involving cardiovascular system                           | 93   | 1.22 | 0.52 |
| 430    | Intracranial hemorrhage                                            | 127  | 0.51 | 0.07 |
| 430.2  | Intracerebral hemorrhage                                           | 48   | 0.48 | 0.22 |
| 430.3  | Subdural hemorrhage                                                | 46   | 0.74 | 0.57 |
| 433    | Cerebrovascular disease                                            | 1675 | 1.03 | 0.73 |
| 433.1  | Occlusion and stenosis of precerebral arteries                     | 308  | 0.84 | 0.38 |
| 433.12 | Cerebral atherosclerosis                                           | 42   | 0.61 | 0.41 |
| 433.2  | Occlusion of cerebral arteries                                     | 608  | 1.05 | 0.73 |
| 433.21 | Cerebral artery occlusion, with cerebral infarction                | 595  | 1.07 | 0.60 |
| 433.3  | Cerebral ischemia                                                  | 671  | 0.96 | 0.76 |
| 433.31 | Transient cerebral ischemia                                        | 656  | 0.93 | 0.57 |
| 433.5  | Cerebral aneurysm                                                  | 51   | 0.67 | 0.44 |
| 433.6  | Acute, but ill-defined cerebrovascular disease                     | 631  | 1.02 | 0.89 |
| 433.8  | Late effects of cerebrovascular disease                            | 539  | 0.86 | 0.31 |
| 440    | Atherosclerosis                                                    | 445  | 0.83 | 0.26 |
| 440.2  | Atherosclerosis of the extremities                                 | 381  | 0.83 | 0.29 |

|        |                                                                                      |      |      |      |
|--------|--------------------------------------------------------------------------------------|------|------|------|
| 440.21 | Atherosclerosis of native arteries of the extremities with ulceration or gangrene    | 59   | 0.74 | 0.53 |
| 440.22 | Atherosclerosis of native arteries of the extremities with intermittent claudication | 284  | 0.77 | 0.21 |
| 442    | Other aneurysm                                                                       | 308  | 1.13 | 0.48 |
| 442.1  | Aortic aneurysm                                                                      | 238  | 1.18 | 0.41 |
| 442.11 | Abdominal aortic aneurysm                                                            | 150  | 0.94 | 0.83 |
| 443    | Peripheral vascular disease                                                          | 998  | 0.82 | 0.08 |
| 443.1  | Raynaud's syndrome                                                                   | 52   | 0.80 | 0.63 |
| 443.8  | Other specified peripheral vascular diseases                                         | 58   | 0.40 | 0.13 |
| 443.9  | Peripheral vascular disease, unspecified                                             | 912  | 0.80 | 0.07 |
| 444    | Arterial embolism and thrombosis                                                     | 82   | 1.66 | 0.09 |
| 444.1  | Arterial embolism and thrombosis of lower extremity artery                           | 47   | 2.27 | 0.02 |
| 446    | Polyarteritis nodosa and allied conditions                                           | 43   | 0.79 | 0.66 |
| 447    | Other disorders of arteries and arterioles                                           | 46   | 1.17 | 0.72 |
| 450    | Noninfectious disorders of lymphatic channels                                        | 106  | 1.05 | 0.87 |
| 451    | Phlebitis and thrombophlebitis                                                       | 178  | 0.53 | 0.04 |
| 451.2  | Phlebitis and thrombophlebitis of lower extremities                                  | 69   | 0.61 | 0.29 |
| 452    | Other venous embolism and thrombosis                                                 | 684  | 0.95 | 0.72 |
| 452.2  | Deep vein thrombosis [DVT]                                                           | 364  | 0.97 | 0.86 |
| 453    | Chronic venous hypertension                                                          | 49   | 0.34 | 0.13 |
| 454    | Varicose veins                                                                       | 537  | 0.72 | 0.04 |
| 454.1  | Varicose veins of lower extremity                                                    | 424  | 0.73 | 0.08 |
| 454.11 | Varicose veins of lower extremity, symptomatic                                       | 209  | 0.60 | 0.06 |
| 455    | Hemorrhoids                                                                          | 2834 | 1.06 | 0.40 |
| 456    | Chronic venous insufficiency [CVI]                                                   | 555  | 0.92 | 0.58 |
| 457    | Encounter for long-term (current) use of anticoagulants, antithrombotics, aspirin    | 429  | 0.89 | 0.47 |
| 457.2  | Encounter for long-term (current) use of antiplatelets/antithrombotics               | 74   | 0.70 | 0.41 |
| 457.3  | Encounter for long-term (current) use of aspirin                                     | 346  | 0.98 | 0.92 |
| 458    | Hypotension                                                                          | 736  | 1.19 | 0.13 |
| 458.1  | Orthostatic hypotension                                                              | 224  | 1.12 | 0.58 |
| 458.9  | Hypotension NOS                                                                      | 403  | 1.21 | 0.22 |
| 459    | Other disorders of circulatory system                                                | 375  | 1.11 | 0.51 |
| 459.9  | Circulatory disease NEC                                                              | 326  | 1.14 | 0.45 |

## Supplemental References

1. Ito K, Bick AG, Flannick J, Friedman DJ, Genovese G, Parfenov MG, Depalma SR, Gupta N, Gabriel SB, Taylor HA, Fox ER, Newton-Cheh C, Kathiresan S, Hirschhorn JN, Altshuler DM, Pollak MR, Wilson JG, Seidman JG, Seidman C. Increased burden of cardiovascular disease in carriers of APOL1 genetic variants. *Circ Res*. 2014;114:845–850.
2. Langefeld CD, Divers J, Pajewski NM, Hawfield AT, Reboussin DM, Bild DE, Kaysen GA, Kimmel PL, Raj DS, Ricardo AC, Wright JT Jr, Sedor JR, Rocco MV, Freedman BI. Apolipoprotein L1 gene variants associate with prevalent kidney but not prevalent cardiovascular disease in the Systolic Blood Pressure Intervention Trial. *Kidney International*. 2015; 87: 169-75
3. Mukamal KJ, Tremaglio J, Friedman DJ, Ix JH, Kuller LH, Tracy RP, Pollak MR. APOL1 Genotype, Kidney and Cardiovascular Disease, and Death in Older Adults. *Arterioscler Thromb Vasc Biol*. 2016;36:398–403.
4. Grams ME, Rebholz CM, Chen Y, Rawlings AM, Estrella MM, Selvin E, Appel LJ, Tin A, Coresh J. Race, APOL1 Risk, and eGFR Decline in the General Population. *J Am Soc Nephrol*. 2016;1-9.
5. Chen TK, Appel LJ, Grams ME, Tin A, Choi MJ, Lipkowitz MS, Winkler CA, Estrella MM. APOL1 Risk Variants and Cardiovascular Disease: Results From the AASK (African American Study of Kidney Disease and Hypertension). *Arterioscler Thromb Vasc Biol*. 2017; 37; 1765-1769.
6. Chen TK, Katz R, Estrella MM, Gutierrez OM, Kramer H, Post WS, Shlipak MG, Wassel CL, Peralta CA. Association between APOL1 genotypes and risk of cardiovascular disease in MESA (Multi-Ethnic Study of Atherosclerosis). *J Am Heart Assoc*. 2017;6:1-9.
7. Wang H, Pun PH, Kwee L, Craig D, Haynes C, Chryst-Ladd M, Svetkey LP, Patel UD, Hauser ER, Pollak MR, Kraus WE, Shah SH. Apolipoprotein L1 Genetic Variants Are Associated with Chronic Kidney Disease but Not with Cardiovascular Disease in a Population Referred for Cardiac Catheterization. *CardioRenal Med*. 2017;7:96–103.
8. Gutiérrez OM, Irvin MR, Chaudhary NS, Cushman M, Zakai NA, David VA, Limou S, Pamir N, Reiner AP, Naik RP, Sale MM, Safford MM, Hyacinth HI, Judd SE, Kopp JB, Winkler CA. APOL1 Nephropathy Risk Variants and Incident Cardiovascular Disease Events in Community-Dwelling Black Adults. *Circ Genomic Precis Med*. 2018;11: e002098.
9. Franceschini N, Kopp JB, Barac A, Martin LW, Li Y, Qian H, Reiner AP, Pollak M, Wallace RB, Rosamond WD, Winkler CA. Association of APOL1 With Heart Failure With Preserved Ejection Fraction in Postmenopausal African American Women. *JAMA Cardiology*. 2018; 3:712-720.

## Appendix: VA Million Veteran Program

### MVP Executive Committee

- Co-Chair: J. Michael Gaziano, M.D., M.P.H.
- Co-Chair: Rachel Ramoni, D.M.D., Sc.D.
- Jim Breeling, M.D. (ex-officio)
- Kyong-Mi Chang, M.D.
- Grant Huang, Ph.D.
- Sumitra Muralidhar, Ph.D.
- Christopher J. O'Donnell, M.D., M.P.H.
- Philip S. Tsao, Ph.D.

### MVP Program Office

- Sumitra Muralidhar, Ph.D.
- Jennifer Moser, Ph.D.

### MVP Recruitment/Enrollment

- Recruitment/Enrollment Director/Deputy Director, Boston – Stacey B. Whitbourne, Ph.D.;  
Jessica V. Brewer, M.P.H.

### MVP Coordinating Centers

- Clinical Epidemiology Research Center (CERC), West Haven – John Concato, M.D., M.P.H.
- Cooperative Studies Program Clinical Research Pharmacy Coordinating Center, Albuquerque  
Stuart Warren, J.D., Pharm D.; Dean P. Argyres, M.S.
- Genomics Coordinating Center, Palo Alto – Philip S. Tsao, Ph.D.
- Massachusetts Veterans Epidemiology Research Information Center (MAVERIC), Boston - J.  
Michael Gaziano, M.D., M.P.H.
- MVP Information Center, Canandaigua – Brady Stephens, M.S.
- Core Biorepository, Boston – Mary T. Brophy M.D., M.P.H.; Donald E. Humphries, Ph.D.
- MVP Informatics, Boston – Nhan Do, M.D.; Shahpoor Shayan  
Data Operations/Analytics, Boston – Xuan-Mai T. Nguyen, Ph.D.

### MVP Science

- Genomics - Christopher J. O'Donnell, M.D., M.P.H.; Saiju Pyarajan Ph.D.; Philip S. Tsao, Ph.D.
- Phenomics - Kelly Cho, M.P.H, Ph.D.
- Data and Computational Sciences – Saiju Pyarajan, Ph.D.
- Statistical Genetics – Elizabeth Hauser, Ph.D.; Yan Sun, Ph.D.; Hongyu Zhao, Ph.D.

### MVP Local Site Investigators

- Atlanta VA Medical Center (Peter Wilson)  
1670 Clairmont Rd, Decatur, GA 30033
- Bay Pines VA Healthcare System (Rachel McArdle)  
10,000 Bay Pines Blvd Bay Pines FL 33744
- Birmingham VA Medical Center (Louis Dellitalia)  
700 S. 19th Street Birmingham AL 35233
- Cincinnati VA Medical Center (John Harley)

- 3200 Vine Street, Cincinnati, OH 45220
- Clement J. Zablocki VA Medical Center (Jeffrey Whittle)  
5000 West National Avenue, Milwaukee, WI 53295
  - Durham VA Medical Center (Jean Beckham)  
508 Fulton Street Durham, NC 27705
  - Edith Nourse Rogers Memorial Veterans Hospital (John Wells)  
200 Springs Road, Bedford, MA 01730
  - Edward Hines, Jr. VA Medical Center (Salvador Gutierrez)  
5000 South 5th Avenue, Hines, IL 60141
  - Fayetteville VA Medical Center (Gretchen Gibson)  
1100 N College Ave, Fayetteville, AR 72703
  - VA Health Care Upstate New York (Laurence Kaminsky)  
113 Holland Avenue Albany NY 12208
  - New Mexico VA Health Care System (Gerardo Villareal)  
1501 San Pedro Drive, S.E. Albuquerque, NM 87108
  - VA Boston Healthcare System (Scott Kinlay)  
150 S. Huntington Avenue, Boston, MA 02130
  - VA Western New York Healthcare System (Junzhe Xu)  
3495 Bailey Avenue Buffalo, NY 14215-1199
  - Ralph H. Johnson VA Medical Center (Mark Hamner)  
109 Bee Street, Mental Health Research, Charleston, SC 29401
  - Wm. Jennings Bryan Dorn VA Medical Center (Kathlyn Sue Haddock)  
6439 Garners Ferry Road, Columbia, SC 29209
  - VA North Texas Health Care System (Sujata Bhushan)  
4500 S. LANCASTER ROAD, DALLAS, TX 75216
  - Hampton VA Medical Center (Pran Iruvanti)  
100 Emancipation Drive, Hampton, VA 23667
  - Hunter Holmes McGuire VA Medical Center (Michael Godschalk)  
1201 Broad Rock Blvd., Richmond, VA 23249
  - Iowa City VA Health Care System (Zuhair Ballas)  
601 Highway 6 West, Iowa City, IA 52246-2208
  - Jack C. Montgomery VA Medical Center (Malcolm Buford)  
1011 Honor Heights Dr., Muskogee, OK 74401
  - James A. Haley Veterans' Hospital (Stephen Mastorides)  
13000 Bruce B. Downs Blvd., Tampa, FL 33612
  - Louisville VA Medical Center (Jon Klein)  
800 Zorn Avenue, Louisville, KY 40206
  - Manchester VA Medical Center (Nora Ratcliffe)  
718 Smyth Road, Manchester, NH 03104
  - Miami VA Health Care System (Hermes Florez)  
1201 NW 16th Street, 11 GRC, Miami FL 33125
  - Michael E. DeBakey VA Medical Center (Alan Swann)

2002 Holcombe Blvd. Houston TX 77030

- Minneapolis VA Health Care System (Maureen Murdoch)  
One Veterans Drive Minneapolis MN 55417
- N. FL/S. GA Veterans Health System (Peruvemba Sriram)  
1601 SW Archer Road, Gainesville, FL 32608
- Northport VA Medical Center (Shing Shing Yeh)  
79 Middleville Road, Northport, NY 11768
- Overton Brooks VA Medical Center (Ronald Washburn)  
510 East Stoner Ave, Shreveport, LA 71101
- Philadelphia VA Medical Center (Darshana Jhala)  
3900 Woodland Avenue, Philadelphia, PA 19104
- Phoenix VA Health Care System (Samuel Aguayo)  
650 E. Indian School Road, Phoenix, AZ 85012
- Portland VA Medical Center (David Cohen)  
3710 SW U.S. Veterans Hospital Road, Portland, OR 97239
- Providence VA Medical Center (Satish Sharma)  
830 Chalkstone Avenue, Providence, RI 02908
- Richard Roudebush VA Medical Center (John Callaghan)  
1481 West 10th Street, Indianapolis, IN 46202
- Salem VA Medical Center (Kris Ann Oursler)  
1970 Roanoke Blvd., Salem, VA 24153
- San Francisco VA Health Care System (Mary Whooley)  
4150 Clement Street, San Francisco, CA 94121
- South Texas Veterans Health Care System (Sunil Ahuja)  
7400 Merton Minter Boulevard, San Antonio, TX 78229
- Southeast Louisiana Veterans Health Care System (Amparo Gutierrez)  
2400 Canal Street, New Orleans, LA 70119
- Southern Arizona VA Health Care System (Ronald Schifman)  
3601 S 6th Ave, Tucson, AZ 85723
- Sioux Falls VA Health Care System (Jennifer Greco)  
2501 W 22nd St, Sioux Falls, SD 57105
- St. Louis VA Health Care System (Michael Rauchman)  
915 North Grand Blvd., St. Louis, MO 63106
- Syracuse VA Medical Center (Richard Servatius)  
800 Irving Avenue, Syracuse, NY 13210
- VA Eastern Kansas Health Care System (Mary Oehlert)  
4101 S 4th Street Trafficway, Leavenworth, KS 66048
- VA Greater Los Angeles Health Care System (Agnes Wallbom)  
11301 Wilshire Blvd Los Angeles, CA 90073
- VA Loma Linda Healthcare System (Ronald Fernando)  
11201 Benton Street, Loma Linda, CA 92357
- VA Long Beach Healthcare System (Timothy Morgan)

- 5901 East 7th Street Long Beach CA 90822
- VA Maine Healthcare System (Todd Stapley)  
1 VA Center, Augusta, ME 04330
  - VA New York Harbor Healthcare System (Scott Sherman)  
423 East 23rd Street New York, NY 10010
  - VA Pacific Islands Health Care System (Gwenevere Anderson)  
459 Patterson Rd, Honolulu, HI 96819
  - VA Palo Alto Health Care System (Philip Tsao)  
3801 Miranda Avenue Palo Alto, CA 94304-1290
  - VA Pittsburgh Health Care System (Elif Sonel)  
University Drive, Pittsburgh, PA 15240
  - VA Puget Sound Health Care System (Edward Boyko)  
1660 S. Columbian Way Seattle, WA 98108-1597
  - VA Salt Lake City Health Care System (Laurence Meyer)  
500 Foothill Drive Salt Lake City, UT 84148
  - VA San Diego Healthcare System (Samir Gupta)  
3350 La Jolla Village Drive, San Diego, CA 92161
  - VA Southern Nevada Healthcare System (Joseph Fayad)  
6900 North Pecos Road, North Las Vegas, NV 89086
  - VA Tennessee Valley Healthcare System (Adriana Hung)  
1310 24th Ave. South Nashville, TN 37212
  - Washington DC VA Medical Center (Jack Lichy)  
50 Irving St, Washington, D. C. 20422
  - W.G. (Bill) Hefner VA Medical Center (Robin Hurley)  
1601 Brenner Ave, Salisbury, NC 28144
  - White River Junction VA Medical Center (Brooks Robey)  
163 Veterans Drive, White River Junction, VT 05009
  - William S. Middleton Memorial Veterans Hospital (Robert Striker)  
2500 Overlook Terrace, Madison, WI 53705
